1 **Title: Prdm8 regulates pMN progenitor specification for motor neuron and oligodendrocyte fates by**  
2 **modulating Shh signaling response**

3  
4 Kayt Scott<sup>1</sup>, Rebecca O'Rourke<sup>1</sup>, Austin Gillen<sup>2,3</sup> and Bruce Appel<sup>1\*</sup>

5  
6 <sup>1</sup>Department of Pediatrics, Section of Developmental Biology, <sup>2</sup>RNA Bioscience Initiative, <sup>3</sup>Division of  
7 Hematology, University of Colorado School of Medicine, Aurora, Colorado 40045

8  
9 \*Author for correspondence: [bruce.appel@cuanschutz.edu](mailto:bruce.appel@cuanschutz.edu)

10  
11 **Summary Statement:**

12 Prdm8 regulates the timing of a motor neuron-oligodendrocyte switch and oligodendrocyte lineage cell  
13 identity in the zebrafish spinal cord.

14 **Abstract:**

15

16 Spinal cord pMN progenitors sequentially produce motor neurons and oligodendrocyte precursor cells  
17 (OPCs). Some OPCs differentiate rapidly as myelinating oligodendrocytes whereas others remain into  
18 adulthood. How pMN progenitors switch from producing motor neurons to OPCs with distinct fates is  
19 poorly understood. pMN progenitors express *prdm8*, which encodes a transcriptional repressor, during  
20 motor neuron and OPC formation. To determine if *prdm8* controls pMN cell fate specification, we used  
21 zebrafish as a model system to investigate *prdm8* function. Our analysis revealed that *prdm8* mutant  
22 embryos have a deficit of motor neurons resulting from a premature switch from motor neuron to OPC  
23 production. Additionally, *prdm8* mutant larvae have excess oligodendrocytes and a concomitant deficit  
24 of OPCs. Notably, pMN cells of mutant embryos have elevated Shh signaling coincident with the motor  
25 neuron to OPC switch. Inhibition of Shh signaling restored the number of motor neurons to normal but  
26 did not rescue the proportion of oligodendrocytes. These data suggest that Prdm8 regulates the motor  
27 neuron-OPC switch by controlling the level of Shh activity in pMN progenitors and also regulates  
28 allocation of oligodendrocyte lineage cell fates.

29

30

31

32

### 33 INTRODUCTION

34 Oligodendrocytes, one of the major glial cell types of the central nervous system (CNS) of vertebrate  
35 animals, increase the speed of axon electrical impulses and support neuron health by wrapping axons  
36 with myelin membrane (Simons and Nave, 2016). In the spinal cord most oligodendrocytes originate  
37 from ventral pMN progenitors (Noll and Miller, 1993; Warf et al., 1991), which express the basic helix  
38 loop helix (bHLH) transcription factor Olig2 (Lu et al., 2000; Novitch et al., 2001; Zhou and Anderson,  
39 2002; Zhou et al., 2000). pMN progenitors first produce motor neurons followed by oligodendrocyte  
40 precursor cells (OPCs) (Richardson et al., 2000; Rowitch, 2004). After specification, some OPCs rapidly  
41 differentiate as myelinating oligodendrocytes whereas other OPCs persist into adulthood (Dawson et al.,  
42 2003; Pringle et al., 1992). The switch from motor neuron to OPC production and subsequent regulation  
43 of oligodendrocyte differentiation require tight control of gene expression through a complex network  
44 of interacting transcription factors and extracellular cues. Whereas many factors that promote  
45 oligodendrocyte differentiation and myelination have been identified (Elbaz and Popko, 2019; Emery,  
46 2010; He and Lu, 2013; Sock and Wegner, 2019; Zuchero and Barres, 2013), the mechanisms that  
47 regulate the onset of OPC specification and maintain some in a non-myelinating state are not well  
48 understood.

49 During early neural tube patterning, pMN progenitors are specified by the morphogen Sonic  
50 Hedgehog (Shh). The Shh ligand, secreted by notochord, a mesodermal structure below the ventral  
51 spinal cord, and floor plate, the ventral-most cells of the neural tube, signals neural progenitors to  
52 acquire ventral identities (Echelard et al., 1993; Martí et al., 1995; Roelink et al., 1994). The Shh ligand  
53 binds to its transmembrane receptor Patched (Ptch), which allows intercellular Shh signaling to be  
54 transduced by Smoothed (Smo). Upon Shh binding, Smo is internalized to promote GliA  
55 transcriptional activity by inhibiting its cleavage to GliR (Briscoe and Thérond, 2013; Danesin and Soula,  
56 2017; Ribes and Briscoe, 2009). Graded Shh activity induces expression of genes that encode bHLH and  
57 homeodomain proteins at distinct positions on the dorsoventral axis (Briscoe and Thérond, 2013; Briscoe  
58 et al., 2000; Poh et al., 2002). The duration of Shh signaling also influences cell fate and gene expression.  
59 Initially, high ventral Shh signaling activates expression of Olig2, then sustained Shh activity promotes  
60 expression of Nkx2.2 adjacent to the floor plate, ventral to Olig2, thus forming two distinct ventral  
61 progenitor domains (Dessaud et al., 2007; Dessaud et al., 2010). The sequential induction of cross-  
62 repressive transcription factors by graded morphogen activity along the dorsoventral axis creates

63 spatially restricted progenitor domains that sequentially give rise to specific neurons and glia (Briscoe et  
64 al., 2000; Lek et al., 2010; Nishi et al., 2015).

65 Shh activity is necessary for the establishment of the pMN domain and motor neuron formation  
66 and subsequently, a transient increase in Shh activity coincides with and is required for timely OPC  
67 specification (Danesin and Soula, 2017). Pharmacological and genetic reduction of Shh signaling in chick,  
68 mouse and zebrafish spinal cords resulted in prolonged motor neuron formation and impaired OPC  
69 formation (Al Oustah et al., 2014; Danesin et al., 2006; Hashimoto et al., 2017; Jiang et al., 2017; Ravanelli  
70 and Appel, 2015; Touahri et al., 2012). Further, chick neural tube explants treated with exogenous Shh  
71 led to premature formation of OPCs at the expense of motor neurons (Danesin et al., 2006; Orentas et  
72 al., 1999). Thus, transient elevation of Shh activity is required to induce the transition from motor neuron  
73 to OPC production. The temporal change in Shh activity is in part due to upregulation of Sulfatase 1/2  
74 by p3 cells, which are ventral to pMN progenitors, prior to OPC specification (Al Oustah et al., 2014;  
75 Danesin et al., 2006; Jiang et al., 2017). Sulfatase expression increases local Shh ligand concentration  
76 available to pMN progenitors (Al Oustah et al., 2014; Danesin et al., 2006) and loss of Sulfatase 1/2  
77 functions delays the motor neuron-OPC switch (Jiang et al., 2017). Whether additional mechanisms  
78 contribute to modulation of Shh signaling strength to regulate fate specification over time is not well  
79 understood.

80 In addition to expressing distinct combinations of bHLH and homeodomain transcription factors,  
81 subsets of spinal cord progenitors express specific PRDI-BF1 and RIZ homology domain containing (Prdm)  
82 proteins (Zannino and Sagerström, 2015). This family of proteins contain a N-terminal SET domain  
83 followed by a varied number of C-terminal zinc finger repeats and act as transcriptional regulators or co-  
84 factors implicated in nervous system patterning, neural stem cell maintenance and differentiation  
85 (Baizabal et al., 2018; Chittka et al., 2012; Hanotel et al., 2014; Hernandez-Lagunas et al., 2011; Kinameri  
86 et al., 2008; Ross et al., 2012; Thélie et al., 2015; Yildiz et al., 2019). In the ventral mouse spinal cord,  
87 neural progenitors express Prdm8 from E9.5 to E13.5 (Kinameri et al., 2008; Komai et al., 2009),  
88 corresponding to the period of motor neuron and OPC formation. The function of Prdm8 in spinal cord  
89 development is not yet known, but in the mouse telencephalon Prdm8 forms a repressive complex with  
90 Bhlhb5, a bHLH transcription factor closely related to Olig2, to regulate axonal migration (Ross et al.,  
91 2012). Moreover, in the retina Prdm8 promotes formation of a subset of rod bipolar cells and regulates  
92 amacrine cell type identity (Jung et al., 2015). These data raise the possibility that Prdm8 regulates pMN  
93 cell development.

94 To investigate *prdm8* expression and function in pMN progenitors we used the developing  
95 zebrafish spinal cord as a model. Our expression analysis showed that pMN progenitors express *prdm8*  
96 prior to and during the switch from motor neuron to OPC production and that, subsequently,  
97 differentiating oligodendrocytes downregulate *prdm8* expression. Because Prdm8 can control cell fate,  
98 we therefore hypothesized that Prdm8 regulates motor neuron and OPC specification. To test this  
99 hypothesis, we performed a series of experiments to assess changes in pMN cell fates resulting from loss  
100 of *prdm8* function. Our data reveal that *prdm8* mutant embryos have a deficit of late-born motor  
101 neurons, excess differentiating oligodendrocytes and a deficit of OPCs. Birthdating studies showed that  
102 the motor neuron deficit results from a premature switch from motor neuron to OPC production. *prdm8*  
103 mutant embryos have abnormally high levels of Shh signaling and pharmacological suppression of Shh  
104 signaling rescued the motor neuron deficit but not the formation of excess oligodendrocytes. Taken  
105 together, our data suggest that Prdm8 dampens Shh signaling activity to modulate the timing of the  
106 motor neuron-OPC switch and secondarily regulates the myelinating fate of oligodendrocyte lineage  
107 cells.

108

## 109 RESULTS

### 110 pMN progenitors and oligodendrocyte lineage cells express *prdm8*

111 To begin our investigation of *prdm8* function, we first assessed the temporal and spatial features of  
112 *prdm8* expression in the zebrafish spinal cord during development. To do so, we performed in situ RNA  
113 hybridization (RNA ISH) using transverse sections obtained from *Tg(olig2:EGFP)* embryos and larvae.  
114 pMN cells in these fish express EGFP driven by *olig2* regulatory DNA (Shin et al., 2003). pMN cells and  
115 cells dorsal to the pMN domain expressed *prdm8* at 24, 36 and 48 hours post-fertilization (hpf) (Fig. 1A).  
116 This is consistent with previous data that revealed that cells of the pMN, p2 and p1 domains in the  
117 developing mouse spinal cord express *Prdm8* (Kinameri et al., 2008; Komai et al., 2009). Next we  
118 evaluated pMN cell expression of *prdm8* through development within a single cell RNA-seq (scRNA-seq)  
119 data set obtained from *olig2:EGFP*<sup>+</sup> cells isolated from 24, 36 and 48 hpf embryos, a period spanning  
120 formation of most motor neurons and OPCs. An aligned Harmony clustering analysis and Uniform  
121 Manifold Approximation and Projection (UMAP) of the data revealed that gene expression profiles  
122 formed several distinct clusters (Fig 1B). Plotting individual gene expression profiles revealed that many  
123 *olig2*<sup>+</sup> *sox19a*<sup>+</sup> cells, which likely represent pMN progenitors, also expressed *prdm8* (Fig. 1C-E).

124 Following motor neuron formation, pMN progenitors begin to form OPCs. This is initiated by the  
125 reorganization of ventral progenitor domains, such that pMN cells that enter the oligodendrocyte  
126 lineage begin to co-express *Nkx2.2* and *Olig2* (Agius et al., 2004; Fu et al., 2002; Kessar et al., 2001;  
127 Soula et al., 2001; Zhou et al., 2001). Our scRNA-seq data show that at 48 hpf, cells that expressed  
128 *nkx2.2a* and *olig2* also expressed *prdm8*, signifying that nascent OPCs express *prdm8* (Fig 1F). We  
129 validated these observations using fluorescent RNA ISH. Consistent with our scRNA-seq data, *prdm8*  
130 mRNA puncta were present in the pMN domain marked by *olig2* expression at 24, 36, and 48 hpf (Fig.  
131 1H-J). At 24 and 36 hpf, cells that expressed *prdm8* and *olig2* were adjacent to more ventral *nkx2.2a*<sup>+</sup> p3  
132 domain cells (Fig. 1G-H), but at 48 hpf some cells at the p3/pMN border expressed all three transcripts  
133 (Fig. 1I). By 72 hpf, most *olig2* mRNA expression was depleted from the pMN domain but evident at high  
134 level in oligodendrocyte lineage cells. At this stage some *olig2*<sup>+</sup> cells expressed both *prdm8* and *nkx2.2a*,  
135 some expressed only *nkx2.2a* and others expressed only *prdm8* (Fig. 1J). These data indicate that  
136 following pMN progenitor cell expression, *prdm8* expression is differentially maintained by  
137 oligodendrocyte lineage cells.

138 To determine the identity of *prdm8*<sup>+</sup> cells, we compared *prdm8* expression with expression of  
139 genes characteristic of the oligodendrocyte lineage in the scRNA-seq dataset. At 48 hpf, a subset of cells  
140 that expressed *prdm8* also expressed *sox10*, which encodes a transcription factor expressed by all  
141 oligodendrocyte lineage cells (Britsch et al., 2001; Kuhlbrodt et al., 1998; Park et al., 2002) (Fig. 2A,B).  
142 Some *prdm8*<sup>+</sup> *sox10*<sup>+</sup> cells also expressed *myrf*, which encodes Myelin Regulatory Factor, a transcription  
143 factor required for oligodendrocyte differentiation (Emery et al., 2009) (Fig. 2C). Our data set includes  
144 only a few *mbpa*<sup>+</sup> cells, and these appeared as a small subset of *sox10*<sup>+</sup> *myrf*<sup>+</sup> cells (Fig. 2D). Therefore,  
145 these cells represent pre-myelinating oligodendrocytes. A heatmap representation of these cells (Fig.  
146 2E,F) showed that most *sox10*<sup>+</sup> *nkx2.2a*<sup>+</sup> cells expressed *prdm8* at high levels. However, cells that also  
147 expressed *myrf* and *mbpa* at higher levels had little *prdm8* expression. These data suggest that pre-  
148 myelinating oligodendrocytes downregulate *prdm8* expression as they differentiate.

149 To corroborate these observations, we compared *prdm8*, *myrf* and *olig2* mRNA expression using  
150 fluorescent RNA ISH in the trunk spinal cord of 72 hpf larvae. Consistent with our scRNA-seq findings,  
151 this revealed that a majority of *olig2*<sup>+</sup> cells expressed either *prdm8* or *myrf* and that few *olig2*<sup>+</sup> cells  
152 expressed both genes (Fig. 2G). To determine if some oligodendrocyte lineage cells maintain *prdm8*  
153 expression, we assessed RNA-seq data collected from *cspg4*<sup>+</sup> OPCs and *mbpa*<sup>+</sup> oligodendrocytes isolated  
154 from 7 days post-fertilization (dpf) larvae (Ravanelli et al., 2018). We found that OPCs expressed *prdm8*

155 at 75-fold higher levels than oligodendrocytes (Fig. 2H). We validated these data using fluorescent RNA  
156 ISH to label *prdm8* mRNA at 7 dpf in combination with *myrf* to mark oligodendrocytes (Fig. 2I) or *cspg4*  
157 to mark OPCs (Fig. 2J). This revealed that OPCs but not oligodendrocytes expressed *prdm8*, confirming  
158 our RNA-seq data. We therefore conclude that pMN progenitors and OPCs express *prdm8* and that  
159 *prdm8* expression declines in oligodendrocytes undergoing differentiation.

160

### 161 **Zebrafish larvae lacking *prdm8* function have excess oligodendrocytes and a deficit of OPCs**

162 Zebrafish *prdm8* encodes a 502 amino acid protein containing an N-terminal PR/SET domain and three  
163 zinc finger domains, similar to its human and mouse orthologs (Fig. 3A). To investigate Prdm8 function  
164 we used CRISPR/Cas9 to create gene-disrupting mutations within the first exon (Fig. 3B). We verified the  
165 efficiency of sgRNA targeting using diagnostic fluorescent PCR and subsequently raised injected embryos  
166 to adulthood. We identified F0 adults that transmitted mutations through the germ line and selected  
167 two, *prdm8<sup>co49</sup>* and *prdm8<sup>co51</sup>*, for further analysis. DNA sequencing revealed that the *co49* allele contains  
168 a 5 bp insertion whereas the *co51* allele has a 4 bp deletion. Both alleles are predicted to result in  
169 translation frameshifting leading to premature translation termination and proteins truncated within  
170 the PR/SET domain (Fig. 3B). Because the C-terminal zinc finger domains of mouse Prdm8 are necessary  
171 for nuclear localization (Eom et al., 2009), we predict that truncated proteins produced by the *co49* and  
172 *co51* alleles are non-functional. Genotyping assays revealed that F1 heterozygous adults transmitted  
173 mutant alleles to progeny with Mendelian frequencies (Fig. 3C). Homozygous mutant embryos have no  
174 discernable morphological phenotype at 24 hpf (Fig. 3D) or at early larval stages (data not shown).

175 To determine if *prdm8* regulates formation of oligodendrocytes, we performed RNA ISH to detect  
176 *myrf* expressed by wild-type and *prdm8* mutant larvae. At 72 hpf, larvae homozygous for the *co49* allele  
177 had almost twice as many spinal cord *myrf<sup>+</sup>* oligodendrocytes compared to wild-type siblings (Fig. 4A,B).  
178 Heterozygous siblings were not different from wild type (Fig. 4A,B). Larvae homozygous for the *co51*  
179 allele similarly had excess *myrf<sup>+</sup>* oligodendrocytes relative to wild-type siblings (Fig. 4C,D). Larvae trans-  
180 heterozygous for the *co49* and *co51* alleles also had a greater number of *myrf<sup>+</sup>* oligodendrocytes (Fig.  
181 4E,F), indicating that this phenotype results specifically from loss of *prdm8* function and not as a  
182 consequence of an off-target mutation produced by CRISPR/Cas9. We additionally examined expression  
183 of *mbpa*. Consistent with our *myrf* data, *co49* homozygous mutant larvae had approximately two-fold  
184 more dorsal *mbpa<sup>+</sup>* oligodendrocytes than wild-type siblings (Fig. 4G,H). These data indicate that Prdm8  
185 limits oligodendrocyte formation.

186 To identify the source of excess oligodendrocytes, we first counted the number of  
187 oligodendrocyte lineage cells using an antibody to detect expression of Sox10 in spinal cord sections of  
188 wild-type and mutant larvae carrying the *Tg(olig2:EGFP)* reporter. At 72 hpf, homozygous *prdm8* mutant  
189 larvae had the same number of Sox10<sup>+</sup> *olig2:EGFP*<sup>+</sup> cells as control larvae (Fig. 5A,B). To determine the  
190 proportion of Sox10<sup>+</sup> cells that differentiated as oligodendrocytes, we then performed  
191 immunohistochemistry to detect Sox10 on sections obtained from 5 dpf larvae carrying a  
192 *Tg(mbpa:tagRFPT)* transgenic reporter. This experiment showed that homozygous *prdm8* mutant larvae  
193 had a significant increase in the number of Sox10<sup>+</sup> *mbpa:tagRFPT*<sup>+</sup> oligodendrocytes without a change in  
194 the total number of Sox10<sup>+</sup> cells relative to sibling controls (Fig. 5C,D). To assess the OPC population we  
195 labeled sections from 5 dpf larvae carrying a *Tg(cspg4:mCherry)* transgenic reporter (Ravanelli et al.,  
196 2018) with Sox10 antibody. Homozygous *prdm8* mutant larvae had fewer OPCs than wild-type siblings,  
197 but total oligodendrocyte lineage cells were unchanged (Fig. 5E,F). These data indicate that Prdm8  
198 regulates the proportion of OPCs that differentiate as oligodendrocytes.

199

#### 200 ***prdm8* regulates the timing of a neuron-glia switch by repressing neural tube Shh signaling activity**

201 We next investigated whether *prdm8* regulates motor neuron formation from pMN progenitors, which  
202 precedes OPC specification. To do so, we used an antibody to detect Isl1/2 (Isl), which marks post-mitotic  
203 motor neurons (Ericson et al., 1992). At 24 hpf, homozygous *prdm8* mutant embryos had the same  
204 number of Isl<sup>+</sup> *olig2:EGFP*<sup>+</sup> motor neurons as controls (Fig. 6A,B), signifying that *prdm8* mutant embryos  
205 initiate motor neuron formation normally. By contrast, at 36 and 48 hpf *prdm8* mutant embryos had  
206 fewer motor neurons than control embryos (Fig. 6C-F), suggesting that Prdm8 is required to maintain  
207 motor neuron production from pMN progenitors.

208 One possible explanation for these data is that in the absence of *prdm8* function, pMN  
209 progenitors prematurely switch from motor neuron to OPC production, resulting in a deficit of motor  
210 neurons. To test this prediction, we exposed 24, 30 and 36 hpf embryos to a pulse of BrdU to label cells  
211 in S-phase and used immunohistochemistry at 48 hpf to identify the progeny of the labeled progenitors  
212 (Fig. 7A). Compared to stage-matched wild-type control embryos, homozygous *prdm8* mutant embryos  
213 exposed to BrdU at each time point had a deficit of BrdU<sup>+</sup> Isl<sup>+</sup> motor neurons (Fig. 7B-H). By contrast,  
214 mutant embryos pulsed with BrdU at 24 and 30 hpf had more BrdU<sup>+</sup> Sox10<sup>+</sup> cells than controls (Fig.  
215 7B,C,E,F,I) whereas those pulsed at 36 hpf had fewer (Fig. 7D,G,I). These data indicate that *prdm8* mutant  
216 embryos prematurely terminate motor neuron formation and concomitantly produce OPCs earlier than



217 normal. However, mutant embryos also prematurely terminate OPC production. Altogether these data  
218 raise the possibility that *Prdm8* prevents premature OPC specification, thus preserving pMN progenitors  
219 for motor neuron fate.

220 OPC specification coincides with and requires a dorsal expansion of *Nkx2.2* expression from the  
221 p3 domain, resulting in co-expression of *Nkx2.2* and *Olig2* (Kessar et al., 2001; Kucenas et al., 2008;  
222 Soula et al., 2001; Xu et al., 2000). Thus, one possible mechanism by which *prdm8* prevents premature  
223 OPC specification is by regulating the time at which pMN progenitors express *nkx2.2a*. To examine this  
224 possibility, we used fluorescent RNA ISH to label *nkx2.2a* and *olig2* mRNA and quantified *nkx2.2a* puncta  
225 in the pMN domain at 28 hpf, prior to OPC specification (Fig. 8A-B). *prdm8* mutant embryos had more  
226 *nkx2.2a* mRNA puncta localized to pMN cells than controls (Fig. 8A-B). Next, we examined the number  
227 of *olig2:EGFP<sup>+</sup>* OPCs that express *nkx2.2a* at 48 hpf. *prdm8* mutant embryos had almost 3-fold more  
228 dorsal *nkx2.2a<sup>+</sup> olig2:EGFP<sup>+</sup>* OPCs compared to controls (Fig. 8C-D). Together, these data suggest that  
229 *prdm8* controls the timing of OPC specification by controlling the time at which pMN cells initiate *nkx2.2a*  
230 expression.

231 At the end of neurogenesis, ventral spinal cord cells transiently elevate Shh signaling activity,  
232 which is necessary for OPC specification (Orentas et al., 1999; Soula et al., 2001; Touahri et al., 2012).  
233 Experimentally increasing Shh levels caused premature termination of motor neuron formation and  
234 precocious OPC formation (Danesin et al., 2006), similar to the loss of *prdm8* function and thereby raising  
235 the possibility that *Prdm8* suppresses Shh activity in the ventral spinal cord. To test this possibility, we  
236 probed for expression of *ptch2*, a transcriptional target of the Shh signaling pathway. At  
237 24 hpf *prdm8* mutant embryos appeared to express more *ptch2* than wild-type embryos (Fig. 9A). By  
238 48 hpf there was no visible difference in *ptch2* expression between genotypes (Fig. 9A). Next we  
239 used fluorescent RNA ISH to quantify *ptch2* expression. At 24 and 36 hpf *prdm8* mutant embryos  
240 expressed more *ptch2* mRNA relative to total spinal cord area compared to controls (Fig. 9B-D). Wild-  
241 type and *prdm8* mutant embryos expressed *shha* similarly, suggesting that the elevated level of *ptch2*  
242 expression results from increased Shh signaling activity is independent of ligand expression (Fig. 9E).  
243 These results are consistent with the possibility that *Prdm8* suppresses Shh response in pMN cells to  
244 regulate the transition between motor neuron and OPC formation.

245 Because the premature transition between motor neuron and OPC production resulting from  
246 lack of *prdm8* function resembled the effect of abnormally elevated Shh signaling, we predicted that the  
247 number of motor neurons in *prdm8* mutant embryos could be rescued by inhibiting Shh activity. To test

248 this prediction, we treated *prdm8* mutant and wild-type embryos with a low concentration of  
249 cyclopamine to partially block Shh signal transduction from 18-30 hpf and assessed motor neuron  
250 number at 48 hpf. The number of motor neurons was similar in *prdm8* mutant embryos treated with  
251 cyclopamine and wild-type embryos treated with vehicle control (Fig. 10A,B), consistent with our  
252 prediction. Furthermore, both wild-type and *prdm8* mutant embryos treated with cyclopamine had  
253 more motor neurons than their genotype-matched controls (Fig. 10B), raising the possibility that  
254 suppression of Shh signaling delays the motor neuron to OPC switch, resulting in formation of excess  
255 motor neurons. By contrast, treatment with cyclopamine from 30-42 hpf, after most spinal cord  
256 neurogenesis is normally completed, had no effect on motor neuron number in either wild-type or  
257 *prdm8* mutant embryos (Fig. 10C,D). Consistent with our previous assessments, vehicle control-treated  
258 mutant embryos had fewer motor neurons than wild-type siblings (Fig. 10A-D). These data therefore  
259 support the possibility that Prdm8 suppresses Shh signaling within pMN cells to regulate the termination  
260 of motor neuron production and the timing of the neuron-glia switch.

261 We next tested whether suppressing Shh signaling in *prdm8* mutant embryos affects  
262 oligodendrocyte development. As above, the number of Sox10<sup>+</sup> cells was not different between wild-  
263 type and mutant larvae treated with a control solution between 18-30 hpf (Fig. 10E,F). Whereas wild-  
264 type embryos treated with control solution or 0.5 μM cyclopamine from 18-30 hpf had similar numbers  
265 of Sox10<sup>+</sup> cells, *prdm8* mutant embryos treated with cyclopamine had a significant deficit of Sox10<sup>+</sup> cells  
266 compared to mutant embryos treated with control solution and wild-type embryos treated with  
267 cyclopamine (Fig. 10E,F). Treating embryos with cyclopamine from 30-42 hpf similarly caused *prdm8*  
268 mutant embryos to have fewer Sox10<sup>+</sup> cells than mutant embryos treated with control solution and wild-  
269 type embryos treated with cyclopamine (Fig. 10G,H). One possible explanation for these observations is  
270 that, although cyclopamine treatment delays the premature neuron-glia transition in *prdm8* mutant  
271 embryos it does not rescue the premature termination of OPC production, thereby resulting in a deficit  
272 of oligodendrocyte lineage cells.

273 We showed above that *prdm8* mutant larvae have excess oligodendrocytes and a deficit of *cspg4*<sup>+</sup>  
274 OPCs. To learn if this phenotype results from misregulated Shh signaling, we treated embryos with  
275 cyclopamine from 30-42 hpf and examined expression of *myrf* as a marker for myelinating  
276 oligodendrocytes. *prdm8* mutant larvae treated with control solution and cyclopamine had similar  
277 numbers of *myrf*<sup>+</sup> oligodendrocytes (Fig. 10I,J). Thus, suppressing Shh signaling did not rescue the excess

278 oligodendrocyte phenotype of *prdm8* mutant larvae, raising the possibility that Prdm8 regulates  
279 oligodendrocyte formation independently of its role in controlling the timing of a neuron-glia switch.

280

## 281 **DISCUSSION**

282 The neuron-glia switch, whereby neural progenitors produce neurons followed by glia, is a general  
283 feature of developing nervous systems (Rowitch and Kriegstein, 2010). Despite its important role in  
284 diversifying neural cell fate, the mechanisms that cause the switch and determine its timing remain  
285 poorly understood. In the ventral spinal cord, a temporally regulated rise in Shh signaling activity appears  
286 to trigger pMN progenitors to switch from motor neuron to OPC production (Danesin and Soula, 2017).  
287 Our results presented here now indicate that Prdm8 suppresses Shh signaling activity within pMN  
288 progenitors to control the timing of the motor neuron-OPC switch.

289         Distinct types of neurons and glia arise from distinct subpopulations of progenitor cells aligned  
290 along the dorsorventral axis of the spinal cord. A large body of work conducted over the past 30 years  
291 has shown that the identities of these progenitor populations are determined by combinatorial  
292 expression of an extensive array of bHLH and homeodomain transcription factors (Sagner and Briscoe,  
293 2019). Additionally, specific subpopulations of spinal cord progenitors also express members of the Prdm  
294 protein family, although how these factors contribute to spinal cord development has received  
295 considerably less attention (Zannino and Sagerstrom, 2015). For example, dorsal progenitors express  
296 Prdm13, which regulates the balance between excitatory and inhibitory interneuron production by  
297 blocking the activity of bHLH transcription factors that drive expression of genes required for excitatory  
298 neuron differentiation (Chang et al., 2013; Mona et al., 2017). p1 progenitors express Prdm12, which is  
299 required for V1 interneuron formation (Thélie et al., 2015) and Prdm14 promotes Islet2 expression and  
300 axon outgrowth in motor neurons (Liu et al., 2012). Finally, pMN, p1 and p2 progenitors express Prdm8  
301 (Kinameri et al., 2008; Komai et al., 2009). Although the spinal cord function of Prdm8 had not been  
302 previously investigated, evidence indicating that Prdm8 regulates specification of retinal cells (Jung et  
303 al., 2015) and that Prdm8 can interact with bHLH transcription factors (Ross et al., 2012; Yildiz et al.,  
304 2019) raises the possibility that Prdm8 contributes to mechanisms that determine spinal cord progenitor  
305 fate.

306         The first main finding of our work is that zebrafish spinal cord cells express *prdm8* similarly to  
307 mouse (Kinameri et al., 2008; Komai et al., 2009). Our data show that pMN progenitors express *prdm8*  
308 throughout developmental neurogenesis and gliogenesis, but that *prdm8* expression subsides from the

309 ventral spinal cord as pMN progenitors are depleted at the onset of the larval period. Furthermore, our  
310 analysis extends the mouse expression data by showing that oligodendrocyte lineage cells also express  
311 *prdm8*. Specifically, our data indicate that newly specified OPCs express *prdm8* but then downregulate  
312 it as they initiate oligodendrocyte differentiation. By contrast, larval OPCs, marked by *cspg4* expression,  
313 maintain *prdm8* expression. Together, these observations raise the possibility that Prdm8 regulates pMN  
314 progenitor fate specification and, subsequently, OPC differentiation.

315 Our second main conclusion is that Prdm8 regulates the timing of the motor neuron to OPC  
316 switch by determining how strongly pMN progenitors respond to Shh signaling. Specifically, we found  
317 that *prdm8* mutant embryos have a deficit of late-born motor neurons because of a premature neuron-  
318 glia switch, that mutant spinal cord cells express abnormally high levels of *ptch2* and that the motor  
319 neuron deficit was rescued by treating mutant embryos with a low concentration of a Shh inhibitor. This  
320 finding supports previous evidence that a transient burst of Shh signaling activity initiates the switch  
321 from motor neuron to OPC production (Danesin and Soula, 2017). This burst is mediated, at least in part,  
322 by Sulfatase function (Al Oustah et al., 2014; Danesin et al., 2006; Jiang et al., 2017). Sulfatases are  
323 secreted by ventral spinal cord cells and increase the range of Shh ligand in the extracellular matrix by  
324 regulating the sulfation state of heparan sulfate proteoglycans (Farzan et al., 2008; Yan and Lin, 2009).  
325 How cells receive and process extracellular signals also can influence signaling strength. In particular,  
326 Notch signaling increases the sensitivity of neural cells to Shh signaling (Kong et al., 2015; Ravanelli et  
327 al., 2018; Stasiulewicz et al., 2015). Currently, we do not know how Prdm8 suppresses Shh signaling  
328 activity within pMN progenitors. Because Prdm8 functions as a transcriptional inhibitor (Chen et al.,  
329 2018; Eom et al., 2009; Iwai et al., 2018; Ross et al., 2012), Prdm8 might suppress expression of factors  
330 that transduce Shh signaling. For example, Prdm8 could suppress expression of the Shh co-receptors  
331 Boc, Cdon and Gas1, which enhance cell response to Shh (Allen et al., 2007; Allen et al., 2011).  
332 Alternatively, Prdm8 could limit expression of Notch signaling effectors that enhance Shh signaling.  
333 Identification of genes misregulated in *prdm8* mutant embryos combined with determination of genomic  
334 loci targeted by Prdm8 should help uncover the regulatory function of Prdm8 in pMN progenitor  
335 specification.

336 Finally, we found that *prdm8* mutant larvae have excess oligodendrocytes at the apparent  
337 expense of OPCs. There are at least two possible explanations for this phenotype. Because our  
338 expression data show that cells undergoing oligodendrocyte differentiation downregulate *prdm8*  
339 expression, the first possibility is that Prdm8 inhibits OPC differentiation and, therefore, in its absence,

340 OPCs that normally persist into larval stage instead develop as myelinating oligodendrocytes. A second  
341 possibility it that *Prdm8* regulates allocation of pMN progenitors for distinct oligodendrocyte lineage cell  
342 fates. Previously, in a process we called progenitor recruitment, we showed that motor neurons, OPCs  
343 that rapidly differentiate and OPCs that persist into larval stage arise from distinct pMN progenitors that  
344 sequentially initiate *olig2* expression (Ravanelli and Appel, 2015; Ravanelli et al., 2018). We also found  
345 that slightly higher levels of Shh signaling favors formation of oligodendrocytes over larval OPCs, which  
346 is similar to the oligodendrocyte phenotype of *prdm8* mutant animals. However, inhibiting Shh with  
347 cyclopamine did not restore oligodendrocytes and OPCs to their normal numbers, raising the possibility  
348 that *Prdm8* regulates oligodendrocyte lineage cell fate independently of Shh signaling. Identifying *Prdm8*  
349 regulatory targets combined with detailed cell lineage analysis will help us discriminate between these  
350 possibilities.

351

352

## 353 **METHODS AND MATERIALS**

### 354 **Zebrafish lines and husbandry**

355 All animal work was approved by the Institutional Animal Care and Use Committee (IAUCUC) at the  
356 University of Colorado School of Medicine. All non-transgenic embryos were obtained from pairwise  
357 crosses of males and females from the AB strain. Embryos were raised at 28.5°C in E3 media (5 mM NaCl,  
358 0.17 mM KCl, 0.33 mM CaCl<sub>2</sub>, 0.33 mM MgSO<sub>4</sub> at pH 7.4, with sodium bicarbonate), sorted for good  
359 health and staged accordingly to developmental morphological features and hours post-fertilization  
360 (hpf) (Kimmel et al., 1995). Developmental stages are described in the results section for individual  
361 experiments. Sex cannot be determined at embryonic and larval stages. Embryos were randomly  
362 assigned to control and experimental conditions for BrdU and pharmacological treatments. The  
363 transgenic lines used were *Tg(olig2:EGFP)<sup>vu12</sup>* (Shin et al., 2003), *Tg(mbpa:tagRFPT)<sup>co25</sup>* (Hines et al., 2015)  
364 and *Tg(cspg4:mCherry)<sup>co28</sup>* (Ravanelli et al., 2018). All transgenic embryos were obtained from pairwise  
365 crosses of males or females from the AB strain to males or females of each transgenic line used.

### 366 **Generation of CRISPR/Cas9 mutant zebrafish lines**

367 We designed a single guide RNA (sgRNA) for the zebrafish *prdm8* gene using the CRISPOR web tool  
368 (<http://crispor.tefor.net/>) (Table 1). The sgRNA was constructed by annealing sense and anti-sense single  
369 stranded oligonucleotides containing 5' Bsa1 restriction overhangs and was inserted into Bsa1 linearized  
370 pDR274 with the Quick Ligase Kit (NEB) (Table 1). The plasmid was transformed into chemically  
371 competent DH5a cells and purified from individual colony liquid cultures with the Qiagen Spin Miniprep  
372 Kit (Qiagen). To make the sgRNA we linearized purified pDR274 containing the guide sequence with Dra1  
373 and used a T7 RNA polymerase for in vitro transcription (NEB). The pMLM3613 plasmid encoding *cas9*  
374 was used for in vitro transcription using the SP6 mMessage mMachin Kit (Ambion) according to  
375 manufacturer's instructions. The sgRNA and *cas9* mRNA were co-injected into single-cell AB zebrafish  
376 embryos at the following concentrations: 200 ng/μl *cas9* mRNA and 150 ng/μl *prdm8* mRNA.

377 The following day injected embryos were assayed for sgRNA activity by DNA extraction and two  
378 rounds of PCR amplification, first to amplify the *prdm8* CRISPR target with gene specific primers  
379 containing a M13F extension to the 5' end of the forward primer (5'TGTAAAACGACGGCCAGT3') and a  
380 second to add a fluorescein tag to the 5' end of the amplified region (Table 2). The fluorescein tagged  
381 PCR product was analyzed using capillary gel electrophoresis to detect product length. To detect F0  
382 founders, we set up pairwise crosses of injected adults with ABs and screened their offspring for  
383 mutagenic events by fluorescent PCR and capillary gel electrophoresis. We used Sanger sequencing to

384 determine the sequence of mutant alleles. We identified two mutant alleles, one with a 5 bp insertion  
385 (*prdm8<sup>co49</sup>*) and another with a 4 bp deletion (*prdm8<sup>co51</sup>*) (Fig. 3B). These lines were maintained as  
386 heterozygotes through pairwise crosses with ABs or transgenic lines.

### 387 **dCAPS Genotyping**

388 To genotype embryos and adults we designed a derived cleaved amplified polymorphic sequencing  
389 (dCAPs) assay to insert a restriction site into either the mutant or wild type allele via PCR. Specific  
390 forward primers were designed for each allele, one that added a BsrG1 restriction site into  
391 the *prdm8<sup>co49</sup>* allele and another that added a Nde1 restriction site into the wild-type allele for  
392 *prdm8<sup>co51</sup>* identification (Table 2). PCR products were digested with appropriate enzymes and samples  
393 were run on a 2.5% agarose gel; the *prdm8<sup>co49</sup>* digest creates 267 and 37 bp mutant digested fragments  
394 and a 299 bp undigested wild type fragment; the *prdm8<sup>co51</sup>* digest creates two digested wild-type  
395 fragments of 260 and 55 bp and a 315 bp undigested mutant fragments (Fig. 3C).

### 396 **BrdU Labeling**

397 Embryos and larvae were dechorionated, incubated in a 20  $\mu$ M BrdU solution for 40 min on ice at  
398 indicated time points (Fig. 7A) and subsequently washed 4  $\times$  5 min with embryo medium. Embryos and  
399 larvae were allowed to develop until 2 dpf in embryo E3 media. Samples were fixed in 4%  
400 paraformaldehyde (PFA) in 1X PBS, embedded (1.5% agar, 5% sucrose), sectioned and prepared for  
401 immunohistochemistry as described below.

### 402 **Cyclopamine Treatment**

403 Cyclopamine (Cat#11321, Cayman Chemical) was reconstituted in ethanol to make a 10 mM stock and  
404 stored at -20°C. Dechorinated embryos were treated with 0.5  $\mu$ M cyclopamine or an equal concentration  
405 of ethanol alone in E3 media at indicated time points. Following treatment, embryos were washed three  
406 times with E3 media and grown to designated time points before fixation.

### 407 **Whole Mount In situ RNA Hybridization**

408 In situ RNA hybridizations were performed as described previously (Hauptmann and Gerster, 2000).  
409 Probes included *ptch2* (Concordet et al., 1996), *nkx2.2a* (Barth and Wilson, 1995), *myrf*, *mbpa* (Brösamle  
410 and Halpern, 2002) and *prdm8* (Table 2). Plasmids were linearized with appropriate restriction enzymes  
411 and cRNA preparation was carried out using Roche DIG-labeling reagents and T3, T7 or SP6 RNA  
412 polymerases (New England Biolabs). After staining, embryos were embedded in 1.5% agar/5% sucrose  
413 and frozen over dry ice. 20  $\mu$ m transverse sections were cut using the Leica CM 1950 cryostat (Leica  
414 Microsystems), collected on microscope slides and mounted with 75% glycerol.

## 415 **Fluorescent In situ RNA Hybridization**

416 Fluorescent in situ RNA hybridization was performed using the RNAScope Multiplex Fluorescent V2 Assay  
417 Kit (Advanced Cell Diagnostics; ACD) on 12 µm thick paraformaldehyde-fixed and agarose embedded  
418 cryosections according to manufacturer's instructions with the following modification: slides were  
419 covered with parafilm for all 40°C incubations to maintain moisture and disperse reagents across the  
420 sections. The zebrafish *olig2-C1*, *nkx2.2a-C2*, *ptch2-C2*, *myrf-C2*, *cspg4-C2*, and *prdm8-C3* transcript  
421 probes were designed and synthesized by the manufacturer and used at 1:50 dilutions. Transcripts were  
422 fluorescently labeled with Opal520 (1:1500), Opal570 (1:500) and Opal650 (1:1500) using the Opal 7 Kit  
423 (NEL797001KT; Perkin Elmer).

## 424 **Cold-active protease cell dissociation and FACs**

425 24, 36, and 48 hpf *Tg(olig2:EGFP)* euthanized embryos were collected in 1.7 ml microcentrifuge tubes  
426 and deyolked in 100 µl of pre-chilled Ca free Ringers solution (116 mM NaCl, 2.6 mM KCl, 5 mM HEPES,  
427 pH 7.0) on ice. Embryos were pipetted intermittently with a p200 micropipettor for 15 minutes and left  
428 for 5 min. 500 µl of protease solution (10 mg/ml BI protease, 125 U/ml DNase, 2.5 mM EDTA, 1X PBS)  
429 was added to microcentrifuge tubes on ice for 15 min and embryos were homogenized every 3 min with  
430 a p100 micropipettor for 15 min. 200 µl of STOP solution (30% FBS, 0.8 mM CaCl<sub>2</sub>, 1X PBS) was then  
431 mixed into the tubes. Samples were then spun down at 400g for 5 min at 4°C and supernatant was  
432 removed. On ice, 1 ml of chilled suspension media (1% FBS, 0.8 mM CaCl<sub>2</sub>, 50 U/ml Penicillin, 0.05 mg/ml  
433 Streptomycin) was added to samples and then spun down again at 400g for 5 min at 4°C. Supernatant  
434 was removed, and 400 µl of chilled suspension media was added and solution was filtered through a 35  
435 µm strainer into a collection tube. Cells were FAC sorted to distinguish EGFP<sup>+</sup> cells using a MoFlo XDP100  
436 cell sorter at the CU-SOM Cancer Center Flow Cytometry Shared Resource and collected in 1.7 ml FBS  
437 coated microcentrifuge tubes in 200 µl of 1X PBS.

## 438 **scRNA Sequencing**

439 The Chromium Box from 10X Genomics was used to capture cells using Chromium Single Cell 3'  
440 Reagent Kit part no. PN-1000075. Libraries were sequenced on the Illumina NovaSEQ6000  
441 Instrument. FASTQ files were analyzed using Cell Ranger Software. 2174 (24h), 2555 (36h) and 3177  
442 (48h) cells were obtained yielding a mean of 118,014 (24h), 65,182 (36h) and 96,053 (48h) reads per  
443 cell with a median of 1929 (24h), 1229 (36h) and 1699 genes identified per cell.

444 Raw sequencing reads were demultiplexed, mapped to the zebrafish reference genome (build  
445 GRCz11/danRer11) and summarized into gene-expression matrices using CellRanger (version 3.0.1). The



446 resulting count matrices were further filtered in Seurat 3.1.0 (<https://satijalab.org/seurat/>) to remove  
447 cell barcodes with fewer than 250 detectable genes, more than 5% of UMIs derived from mitochondrial  
448 genes, or more than 50,000 UMIs (to exclude putative doublets). This filtering resulted in 6,489 single  
449 cells across all samples (1,952 from 24 hpf; 2,147 from 36 hpf; 2,390 from 48 hpf). After standard Seurat  
450 normalization, PCA was run using the 1,291 most variable genes. Next, dimensionality reduction was  
451 performed using Uniform Manifold Approximation and Projection (UMAP) on the first 15 principal  
452 components. Differential expression and marker gene identification was performed using MAST (  
453 <https://doi.org/10.1186/s13059-015-0844-5>).

#### 454 **Immunohistochemistry**

455 Larvae were fixed using 4% paraformaldehyde/1X PBS overnight at 4°C. Embryos were washed with 1X  
456 PBS, rocking at room temperature and embedded in 1.5% agar/5% sucrose, frozen over dry ice and  
457 sectioned in 20 or 15 µm transverse increments using a cryostat microtome. Slides were place in  
458 Sequenza racks (Thermo Scientific), washed 3×5 min in 0.1%Triton-X 100/1X PBS (PBSTx), blocked 1 hour  
459 in 2% goat serum/2% bovine serum albumin/PBSTx and then placed in primary antibody (in block)  
460 overnight at 4°C. The primary antibodies used include: rabbit anti-Sox10 (1:500; H.C. Park et al., 2005),  
461 mouse anti-Islet (1:500; DSH AB2314683), rat anti-BrdU (1:100; Abcam AB6326) or mouse JL-8 Living  
462 Colors (1:500; Clonetech 632380) to restore *Tg(olig2:EGFP)* fluorescence after RNA ISH. Sections were  
463 washed for 1 hours at room temperature with PBSTx and then incubated for 2 hr at room temperature  
464 with secondary antibodies at a 1:200 dilution in block. The secondary antibodies used include: AlexaFluor  
465 488 anti-rabbit (Invitrogen A11008), AlexaFluor 588 anti-rabbit (Invitrogen A11011), AlexaFluor 647 anti-  
466 rabbit (Jackson Immuno. 111606144), AlexaFluor 488 anti-mouse (Life Tech., A11001), AlexaFluor 568  
467 anti-mouse (Invitrogen A11004) and AlexaFluor 568 anti-rat (Invitrogen A11077). Sections were washed  
468 for 1 hr with PBSTx and mounted in VectaShield (Vector Laboratories).

#### 469 **Imaging**

470 Fixed sections of embryos and larvae were imaged on a Zeiss CellObserver SD 25 spinning disk confocal  
471 system (Carl Zeiss) or a Zeiss Axiovert 200 microscope equipped with a PerkinElmer spinning disk  
472 confocal system (Perkin Elmer Improvision). IHC cell counts were collected using a 20x objective (n.a.  
473 0.8) and representative images were collected using a 40x oil immersion objective (n.a. 1.3). Wild-type  
474 1 dpf larvae were positioned on top of a 2% agarose plate and imaged using a Leica M165FC dissection  
475 scope (Leica Microsystems) with a SPOT RT3 camera (SPOT Imaging). RNA ISH sections were imaged  
476 using differential interference contrast optics and a Zeiss AxioObserver compound microscope (Carl

477 Zeiss). Cell counts and representative images were acquired at 40X (n.a. 0.75). Images are reported as  
478 extended z-projections or a single plan (RNA ISH) collected using Volocity (Perkin Elmer) or Zen (Carl  
479 Zeiss) imaging software. Image brightness and contrast were adjusted in Photoshop (Adobe) or ImageJ  
480 (National Institutes of Health).

#### 481 **Data Quantification and Statistical Analysis**

##### 482 **Immunohistochemistry and RNA ISH**

483 Quantifications of fluorescent cell numbers in transverse sections were performed by collecting confocal  
484 z-stacks of the entire section. Quantifications of RNA ISH cell numbers in transverse sections were  
485 performed by viewing the entire z-plane. Data for each embryo was collected from 10 consecutive trunk  
486 spinal cord sections and n represents the average number of cells per section in one embryo. All cell  
487 counts on sections were performed on blinded slides except Fig. 4A-D and Fig. 6E-F.

##### 488 **Fluorescent RNA ISH**

489 Quantification of fluorescent RNA ISH hybridization was carried out on z-projections collected at  
490 identical exposures. All quantification was performed in ImageJ Fiji using a custom script created by  
491 Karlie Fedder (available upon request). First, ten 0.5  $\mu\text{m}$  z intervals were maximum z-projected and  
492 background was subtracted using a 2-rolling ball. The image was then thresholded by taking 2 standard  
493 deviations above the mean fluorescence intensity. A region of interest was drawn around the pMN  
494 domain or spinal cord and puncta were analyzed using the “Analyze Particles” feature with a size of 0.01-  
495 Infinity and circularity of 0.00-1.00. All thresholded puncta were inspected to ensure single molecules  
496 were selected. Puncta with an area of only 1 pixel were removed from the dataset. Data for each embryo  
497 was collected from 5 consecutive trunk spinal cord sections and n represents the average number of  
498 puncta in a region of interest per section in a single embryo.

##### 499 **Statistical Analysis**

500 We plotted all data and performed all statistical analyses in GraphPad Prism. All data are expressed as  
501 mean  $\pm$  SEM. Normality was assessed with a D’Agostino and Pearson omnibus test. For statistical  
502 analysis, we used Student’s two-tailed t-test for all data with normal distributions or Mann-Whitney tests  
503 for non-normal data. Unless otherwise stated, all graphs represent data collected from one laboratory  
504 replicate, sampling fish from multiple crosses with no inclusion or exclusion criteria.

505

##### 506 **Acknowledgements**

507 We thank Christina Kearns for isolating cells for scRNA-seq and members of the Appel lab and the  
508 Section of Developmental Biology for discussions and advice. Cell sorting was performed by the  
509 University of Colorado Cancer Center Flow Cytometry Shared Resource, supported by the Cancer  
510 Center Support Grant (P30CA046934). scRNA-seq was performed by the University of Colorado  
511 Anschutz Medical Campus Genomics Shared Resource Core Facility, supported by the Cancer Center  
512 Support Grant (P30CA046934). Single cell RNA-sequencing and bioinformatics analysis was supported  
513 by a pilot award from the University of Colorado RNA Bioscience Initiative. The University of Colorado  
514 Anschutz Medical Campus Zebrafish Core Facility was supported by National Institutes of Health grant  
515 P30 NS048154.

516

### 517 **Competing interests**

518 The authors declare no competing or financial interests.

519

### 520 **Funding**

521 This work was supported by the National Institutes of Health grant NS406668 and a gift from the Gates  
522 Frontiers Fund to B.A.

523

### 524 **Data availability**

525 All data are available within the manuscript.

526

527

528

529

530 **References**

- 531 **Agius, E., Soukkarieh, C., Danesin, C., Kan, P., Takebayashi, H., Soula, C. and Cochard, P. (2004).**  
532 Converse control of oligodendrocyte and astrocyte lineage development by Sonic hedgehog in the  
533 chick spinal cord. *Dev. Biol.* **270**, 308–321.
- 534 **Al Oustah, A., Danesin, C., Khouri-Farah, N., Farreny, M.-A., Escalas, N., Cochard, P., Glise, B. and**  
535 **Soula, C. (2014).** Dynamics of sonic hedgehog signaling in the ventral spinal cord are controlled by  
536 intrinsic changes in source cells requiring sulfatase 1. *Development* **141**, 1392–403.
- 537 **Allen, B. L., Tenzen, T. and McMahon, A. P. (2007).** The Hedgehog-binding proteins Gas1 and Cdo  
538 cooperate to positively regulate Shh signaling during mouse development. *Genes Dev.* **21**, 1244–  
539 57.
- 540 **Allen, B. L., Song, J. Y., Izzi, L., Althaus, I. W., Kang, J.-S., Charron, F., Krauss, R. S. and McMahon, A. P.**  
541 (2011). Overlapping roles and collective requirement for the coreceptors GAS1, CDO, and BOC in  
542 SHH pathway function. *Dev. Cell* **20**, 775–87.
- 543 **Baizabal, J.-M., Mistry, M., García, M. T., Gómez, N., Olukoya, O., Tran, D., Johnson, M. B., Walsh, C.**  
544 **A. and Harwell, C. C. (2018).** The Epigenetic State of PRDM16-Regulated Enhancers in Radial Glia  
545 Controls Cortical Neuron Position. *Neuron* **98**, 945–962.
- 546 **Barth, K. A. and Wilson, S. W. (1995).** Expression of zebrafish nk2.2 is influenced by sonic  
547 hedgehog/vertebrate hedgehog-1 and demarcates a zone of neuronal differentiation in the  
548 embryonic forebrain. *Development* **121**, 1755–68.
- 549 **Briscoe, J. and Théron, P. P. (2013).** The mechanisms of Hedgehog signalling and its roles in  
550 development and disease. *Nat. Rev. Mol. Cell Biol.* **14**, 416–429.
- 551 **Briscoe, J., Pierani, A., Jessell, T. M. and Ericson, J. (2000).** A homeodomain protein code specifies  
552 progenitor cell identity and neuronal fate in the ventral neural tube. *Cell* **101**, 435–445.
- 553 **Britsch, S., Goerich, D. E., Riethmacher, D., Peirano, R. I., Rossner, M., Nave, K. A., Birchmeier, C. and**  
554 **Wegner, M. (2001).** The transcription factor Sox10 is a key regulator of peripheral glial  
555 development. *Genes Dev.* **15**, 66–78.
- 556 **Brösamle, C. and Halpern, M. E. (2002).** Characterization of myelination in the developing zebrafish.  
557 *Glia* **39**, 47–57.
- 558 **Chang, J. C., Meredith, D. M., Mayer, P. R., Borromeo, M. D., Lai, H. C., Ou, Y.-H. and Johnson, J. E.**  
559 (2013). Prdm13 Mediates the Balance of Inhibitory and Excitatory Neurons in Somatosensory  
560 Circuits. *Dev. Cell* **25**, 182–195.

- 561 **Chen, Z., Gao, W., Pu, L., Zhang, L., Han, G., Zuo, X., Zhang, Y., Li, X., Shen, H., Wang, X., et al. (2018).**  
562 PRDM8 Exhibits Anti-Tumor Activities Toward Hepatocellular Carcinoma by Targeting NAP1L1.  
563 *Hepatology* **68**, 994–1009.
- 564 **Chittka, A., Nitarska, J., Grazini, U. and Richardson, W. D. (2012).** Transcription factor positive  
565 regulatory domain 4 (PRDM4) recruits protein arginine methyltransferase 5 (PRMT5) to mediate  
566 histone arginine methylation and control neural stem cell proliferation and differentiation. *J. Biol.*  
567 *Chem.* **287**, 42995–3006.
- 568 **Concordet, J. P., Lewis, K. E., Moore, J. W., Goodrich, L. V., Johnson, R. L., Scott, M. P. and Ingham, P.**  
569 **W. (1996).** Spatial regulation of a zebrafish patched homologue reflects the roles of sonic  
570 hedgehog and protein kinase A in neural tube and somite patterning. *Development* **122**, 2835–  
571 2846.
- 572 **Danesin, C. and Soula, C. (2017).** Moving the Shh Source over Time: What Impact on Neural Cell  
573 Diversification in the Developing Spinal Cord? *J. Dev. Biol.* **2017**, Vol. 5, Page 4 **5**, E4.
- 574 **Danesin, C., Agius, E., Escalas, N., Ai, X., Emerson, C., Cochard, P. and Soula, C. (2006).** Ventral neural  
575 progenitors switch toward an oligodendroglial fate in response to increased Sonic hedgehog (Shh)  
576 activity: involvement of Sulfatase 1 in modulating Shh signaling in the ventral spinal cord. *J.*  
577 *Neurosci.* **26**, 5037–48.
- 578 **Dawson, M. R. L., Polito, A., Levine, J. M. and Reynolds, R. (2003).** NG2-expressing glial progenitor  
579 cells: an abundant and widespread population of cycling cells in the adult rat CNS. *Mol. Cell.*  
580 *Neurosci.* **24**, 476–88.
- 581 **Dessaud, E., Yang, L. L., Hill, K., Cox, B., Ulloa, F., Ribeiro, A., Mynett, A., Novitch, B. G. and Briscoe, J.**  
582 **(2007).** Interpretation of the sonic hedgehog morphogen gradient by a temporal adaptation  
583 mechanism. *Nature* **450**, 717–720.
- 584 **Dessaud, E., Ribes, V., Balaskas, N., Yang, L. L., Pierani, A., Kicheva, A., Novitch, B. G., Briscoe, J. and**  
585 **Sasai, N. (2010).** Dynamic Assignment and Maintenance of Positional Identity in the Ventral  
586 Neural Tube by the Morphogen Sonic Hedgehog. *PLoS Biol.* **8**, e1000382.
- 587 **Echelard, Y., Epstein, D. J., St-Jacques, B., Shen, L., Mohler, J., McMahon, J. A. and McMahon, A. P.**  
588 **(1993).** Sonic hedgehog, a member of a family of putative signaling molecules, is implicated in the  
589 regulation of CNS polarity. *Cell* **75**, 1417–30.
- 590 **Elbaz, B. and Popko, B. (2019).** Molecular Control of Oligodendrocyte Development. *Trends Neurosci.*  
591 **42**, 263–277.

- 592 **Emery, B.** (2010). Regulation of Oligodendrocyte Differentiation and Myelination. *Science* **330**, 779–  
593 782.
- 594 **Emery, B., Agalliu, D., Cahoy, J. D., Watkins, T. A., Dugas, J. C., Mulinyawe, S. B., Ibrahim, A., Ligon, K.**  
595 **L., Rowitch, D. H. and Barres, B. A.** (2009). Myelin Gene Regulatory Factor Is a Critical  
596 Transcriptional Regulator Required for CNS Myelination. *Cell* **138**, 172–185.
- 597 **Eom, G. H., Kim, K., Kim, S.-M., Kee, H. J., Kim, J.-Y., Jin, H. M., Kim, J.-R., Kim, J. H., Choe, N., Kim, K.-**  
598 **B., et al.** (2009). Histone methyltransferase PRDM8 regulates mouse testis steroidogenesis.  
599 *Biochem. and Biophys. Comm.* **388**, 131-136.
- 600 **Ericson, J., Thor, S., Edlund, T., Jessell, T. and Yamada, T.** (1992). Early stages of motor neuron  
601 differentiation revealed by expression of homeobox gene *Islet-1*. *Science* (80- ). **256**, 1555–1560.
- 602 **Farzan, S. F., Singh, S., Schilling, N. S. and Robbins, D. J.** (2008). Hedgehog Processing and Biological  
603 Activity. *Am. J. Physiol. Gastrointest. Liver Physiol.* **294**, G844-849.
- 604 **Fu, H., Qi, Y., Tan, M., Cai, J., Takebayashi, H., Nakafuku, M., Richardson, W. and Qiu, M.** (2002). Dual  
605 origin of spinal oligodendrocyte progenitors and evidence for the cooperative role of *Olig2* and  
606 *Nkx2.2* in the control of oligodendrocyte differentiation. *Development* **129**, 681–693.
- 607 **Hanotel, J., Bessodes, N., Thélie, A., Hedderich, M., Parain, K., Driessche, B. Van, Brandão, K. D. O.,**  
608 **Kricha, S., Jorgensen, M. C., Grapin-Botton, A., et al.** (2014). The *Prdm13* histone  
609 methyltransferase encoding gene is a *Ptf1a*–*Rbpj* downstream target that suppresses  
610 glutamatergic and promotes GABAergic neuronal fate in the dorsal neural tube. *Dev. Biol.* **386**,  
611 340–357.
- 612 **Hashimoto, H., Jiang, W., Yoshimura, T., Moon, K.-H., Bok, J. and Ikenaka, K.** (2017). Strong sonic  
613 hedgehog signaling in the mouse ventral spinal cord is not required for oligodendrocyte precursor  
614 cell (OPC) generation but is necessary for correct timing of its generation. *Neurochem. Int.* **119**,  
615 178–183.
- 616 **Hauptmann, G. and Gerster, T.** (2000). Multicolor whole-mount in situ hybridization. *Methods Mol.*  
617 *Biol.* **137**, 139–148.
- 618 **He, L. and Lu, Q. R.** (2013). Coordinated control of oligodendrocyte development by extrinsic and  
619 intrinsic signaling cues. *Neurosci Bull* **29**, 129–143.
- 620 **Hernandez-Lagunas, L., Powell, D. R., Law, J., Grant, K. A. and Artinger, K. B.** (2011). *Prdm1a* and *olig4*  
621 act downstream of Notch signaling to regulate cell fate at the neural plate border. *Dev. Biol.* **356**,  
622 496–505.

- 623 **Iwai, R., Tabata, H., Inoue, M., Nomura, K.-I., Okamoto, T., Ichihashi, M., Nagata, K.-I. and Mizutani,**  
624 **K.-I. (2018).** A Prdm8 target gene Ebf3 regulates multipolar-to-bipolar transition in migrating  
625 neocortical cells. *Biochem. Biophys. Res. Commun.* **495**, 388–394.
- 626 **Jiang, W., Ishino, Y., Hashimoto, H., Keino-Masu, K., Masu, M., Uchimura, K., Kadomatsu, K.,**  
627 **Yoshimura, T. and Ikenaka, K. (2017).** Sulfatase 2 Modulates Fate Change from Motor Neurons to  
628 Oligodendrocyte Precursor Cells through Coordinated Regulation of Shh Signaling with Sulfatase 1.  
629 *Dev. Neurosci.* **39**, 361–374.
- 630 **Jung, C. C., Atan, D., Ng, D., Ploder, L., Ross, S. E., Klein, M., Birch, D. G., Diez, E. and McInnes, R. R.**  
631 **(2015).** Transcription factor PRDM8 is required for rod bipolar and type 2 OFF-cone bipolar cell  
632 survival and amacrine subtype identity. *Proc. Natl. Acad. Sci. U. S. A.* **112**, E3010-9.
- 633 **Kessarlis, N., Pringle, N. and Richardson, W. D. (2001).** Ventral neurogenesis and the neuron-glia  
634 switch. *Neuron* **31**, 677–80.
- 635 **Kinameri, E., Inoue, T., Aruga, J., Imayoshi, I., Kageyama, R., Shimogori, T. and Moore, A. W. (2008).**  
636 Prdm proto-oncogene transcription factor family expression and interaction with the Notch-Hes  
637 pathway in mouse neurogenesis. *PLoS One* **3**, e3859.
- 638 **Komai, T., Iwanari, H., Mochizuki, Y., Hamakubo, T. and Shinkai, Y. (2009).** Expression of the mouse  
639 PR domain protein Prdm8 in the developing central nervous system. *Gene Expr. Patterns* **9**, 503–  
640 514.
- 641 **Kong, J. H., Yang, L., Briscoe, J., Novitsch Correspondence, B. G., Dessaud, E., Chuang, K., Moore, D.**  
642 **M., Rohatgi, R. and Novitsch, B. G. (2015).** Notch Activity Modulates the Responsiveness of Neural  
643 Progenitors to Sonic Hedgehog Signaling. *Dev. Cell* **33**, 373–387.
- 644 **Kucenas, S., Snell, H. and Appel, B. (2008).** nkx2.2a promotes specification and differentiation of a  
645 myelinating subset of oligodendrocyte lineage cells in zebrafish. *Neuron Glia Biol.* **4**, 71–81.
- 646 **Kuhlbrodt, K., Herbarth, B., Sock, E., Hermans-Borgmeyer, I. and Wegner, M. (1998).** Sox10, a novel  
647 transcriptional modulator in glial cells. *J. Neurosci.* **18**, 237–50.
- 648 **Lek, M., Dias, J. M., Marklund, U., Uhde, C. W., Kurdija, S., Lei, Q., Sussel, L., Rubenstein, J. L., Matisse,**  
649 **M. P., Arnold, H. H., et al. (2010).** A homeodomain feedback circuit underlies step-function  
650 interpretation of a Shh morphogen gradient during ventral neural patterning. *Development* **137**,  
651 4051–4060.
- 652 **Liu, C., Ma, W., Su, W., Zhang, J., Brand, M., Furutani-Seiki, M., Haffter, P., Hammerschmidt, M.,**  
653 **Heisenberg, C. P., Jiang, Y. J., et al. (2012).** Prdm14 acts upstream of islet2 transcription to

- 654 regulate axon growth of primary motoneurons in zebrafish. *Development* **139**, 4591–600.
- 655 **Lu, Q. R., Yuk, D. I., Alberta, J. A., Zhu, Z., Pawlitzky, I., Chan, J., McMahon, A. P., Stiles, C. D. and**
- 656 **Rowitch, D. H.** (2000). Sonic hedgehog-regulated oligodendrocyte lineage genes encoding bHLH
- 657 proteins in the mammalian central nervous system. *Neuron* **25**, 317–329.
- 658 **Martí, E., Takada, R., Bumcrot, D. A., Sasaki, H. and McMahon, A. P.** (1995). Distribution of Sonic
- 659 hedgehog peptides in the developing chick and mouse embryo. *Development* **121**, 2537–47.
- 660 **Mona, B., Uruena, A., Kollipara, R. K., Ma, Z., Borromeo, M. D., Chang, J. C. and Johnson, J. E.** (2017).
- 661 Repression by PRDM13 is critical for generating precision in neuronal identity. *Elife* **6**, e25787.
- 662 **Nishi, Y., Zhang, X., Jeong, J., Peterson, K. A., Vedenko, A., Bulyk, M. L., Hide, W. A. and McMahon, A.**
- 663 **P.** (2015). A direct fate exclusion mechanism by Sonic hedgehog-regulated transcriptional
- 664 repressors. *Development* **142**, 3286–93.
- 665 **Noll, E. and Miller, R. H.** (1993). Oligodendrocyte precursors originate at the ventral ventricular zone
- 666 dorsal to the ventral midline region in the embryonic rat spinal cord. *Development* **118**, 563–73.
- 667 **Novitsch, B. G., Chen, A. I. and Jessell, T. M.** (2001). Coordinate regulation of motor neuron subtype
- 668 identity and pan-neuronal properties by the bHLH repressor Olig2. *Neuron* **31**, 773–89.
- 669 **Orentas, D. M., Hayes, J. E., Dyer, K. L. and Miller, R. H.** (1999). Sonic hedgehog signaling is required
- 670 during the appearance of spinal cord oligodendrocyte precursors. *Development* **126**, 2419–2429.
- 671 **Park, H.-C., Mehta, A., Richardson, J. S. and Appel, B.** (2002). olig2 Is Required for Zebrafish Primary
- 672 Motor Neuron and Oligodendrocyte Development. *Dev. Biol.* **248**, 356–368.
- 673 **Poh, A., Karunaratne, A., Kolle, G., Huang, N., Smith, E., Starkey, J., Wen, D., Wilson, I., Yamada, T.**
- 674 **and Hargrave, M.** (2002). *Patterning of the vertebrate ventral spinal cord.*
- 675 **Pringle, N. P., Mudhar, H. S., Collarini, E. J. and Richardson, W. D.** (1992). PDGF receptors in the rat
- 676 CNS: during late neurogenesis, PDGF alpha-receptor expression appears to be restricted to glial
- 677 cells of the oligodendrocyte lineage. *Development* **115**, 535–51.
- 678 **Ravanelli, A. M. and Appel, B.** (2015). Motor neurons and oligodendrocytes arise from distinct cell
- 679 lineages by progenitor recruitment. *Genes Dev.* **29**, 2504–2515.
- 680 **Ravanelli, A. M., Kearns, C. A., Powers, R. K., Wang, Y., Hines, J. H., Donaldson, M. J. and Appel, B.**
- 681 (2018). Sequential Specification of Oligodendrocyte and NG2 Cell Fates by Distinct Levels of
- 682 Hedgehog Signaling Running title: Hh Signaling and Glial Cell Fate.
- 683 **Ribes, V. and Briscoe, J.** (2009). Establishing and interpreting graded Sonic Hedgehog signaling during
- 684 vertebrate neural tube patterning: the role of negative feedback. *Cold Spring Harb. Perspect. Biol.*



- 685 1, a002014.
- 686 **Richardson, W. D., Smith, H. K., Sun, T., Pringle, N. P., Hall, A. and Woodruff, R.** (2000).  
687 Oligodendrocyte lineage and the motor neuron connection. *Glia* **29**, 136–42.
- 688 **Roelink, H., Augsburger, A., Heemskerk, J., Korzh, V., Norlin, S., Ruiz i Altaba, A., Tanabe, Y., Placzek,**  
689 **M., Edlund, T., Jessell, T. M., et al.** (1994). Floor plate and motor neuron induction by vhh-1, a  
690 vertebrate homolog of hedgehog expressed by the notochord. *Cell* **76**, 761–775.
- 691 **Ross, S. E., Mccord, A. E., Jung, C., Atan, D., Mok, S. I., Hemberg, M., Kim, T.-K., Salogiannis, J., Hu, L.,**  
692 **Cohen, S., et al.** (2012). Bhlhb5 and Prdm8 form a repressor complex involved in neuronal circuit  
693 assembly. *Neuron. January* **26**, 292–303.
- 694 **Rowitch, D. H.** (2004). Glial specification in the vertebrate neural tube. *Nat. Rev. Neurosci.* **5**, 409–419.
- 695 **Rowitch, D. H. and Kriegstein, A. R.** Developmental genetics of vertebrate glial-cell specification.
- 696 **Simons, M. and Nave, K. A.** (2016). Oligodendrocytes: Myelination and axonal support. *Cold Spring*  
697 *Harb. Perspect. Biol.* **8**, a020479.
- 698 **Sock, E. and Wegner, M.** (2019). Transcriptional control of myelination and remyelination. *Glia* **67**,  
699 2153–2165.
- 700 **Soula, C., Danesin, C., Kan, P., Grob, M., Poncet, C. and Cochard, P.** (2001). Distinct sites of origin of  
701 oligodendrocytes and somatic motoneurons in the chick spinal cord: oligodendrocytes arise from  
702 Nkx2.2-expressing progenitors by a Shh-dependent mechanism. *Development* **129**, 681–693.
- 703 **Stasiulewicz, M., Gray, S. D., Mastromina, I., Silva, J. C., Bjö Rklund, M., Seymour, P. A., Booth, D.,**  
704 **Thompson, C., Green, R. J., Hall, E. A., et al.** (2015). A conserved role for Notch signaling in  
705 priming the cellular response to Shh through ciliary localisation of the key Shh transducer Smo.  
706 *Development* **142**, 2291–303.
- 707 **Thélie, A., Desiderio, S., Hanotel, J., Quigley, I., Driessche, B. Van, Rodari, A., Borromeo, M. D.,**  
708 **Kricha, S., Lahaye, F., Croce, J., et al.** (2015). Prdm12 specifies V1 interneurons through cross-  
709 repressive interactions with Dbx1 and Nkx6 genes in *Xenopus*. *Development* **142**, 3416–3428.
- 710 **Touahri, Y., Escalas, N., Benazeraf, B., Cochard, P., Danesin, C. and Soula, C.** (2012). Sulfatase 1  
711 Promotes the Motor Neuron-to-Oligodendrocyte Fate Switch by Activating Shh Signaling in Olig2  
712 Progenitors of the Embryonic Ventral Spinal Cord. *J. Neurosci.* **32**, 18018–18034.
- 713 **Warf, B. C., Fok-Seang, J. and Miller, R. H.** (1991). Evidence for the ventral origin of oligodendrocyte  
714 precursors in the rat spinal cord. *J. Neurosci.* **11**, 2477–88.
- 715 **Wolswijk, G. and Noble, M.** (1989). Identification of an adult-specific glial progenitor cell. *Development*

- 716           **105**, 387–400.
- 717 **Xu, X., Cai, J., Fu, H., Wu, R., Qi, Y., Modderman, G., Liu, R. and Qiu, M.** (2000). Selective Expression of  
718 Nkx-2.2 Transcription Factor in Chicken Oligodendrocyte Progenitors and Implications for the  
719 Embryonic Origin of Oligodendrocytes. *Mol. Cell. Neurosci.* **16**, 740–753.
- 720 **Yan, D. and Lin, X.** (2009). Shaping morphogen gradients by proteoglycans. *Cold Spring Harb. Perspect.*  
721 *Biol.* **1**, a002493.
- 722 **Yildiz, O., Downes, G. B. and Sagerström, C. G.** (2019) Zebrafish prdm12b acts independently of nkx6.1  
723 repression to promote eng1b expression in the neural tube p1 domain. *Neural Dev.* **14**, 5.
- 724 **Zannino, D. A. and Sagerström, C. G.** (2015). An emerging role for prdm family genes in dorsoventral  
725 patterning of the vertebrate nervous system. *Neural Dev.* **10**, 24.
- 726 **Zhou, Q. and Anderson, D. J.** (2002). The bHLH transcription factors OLIG2 and OLIG1 couple neuronal  
727 and glial subtype specification. *Cell* **109**, 61–73.
- 728 **Zhou, Q., Wang, S. and Anderson, D. J.** (2000). Identification of a novel family of oligodendrocyte  
729 lineage-specific basic helix-loop-helix transcription factors. *Neuron* **25**, 331–343.
- 730 **Zhou, Q., Choi, G. and Anderson, D. J.** (2001). The bHLH transcription factor Olig2 promotes  
731 oligodendrocyte differentiation in collaboration with Nkx2.2. *Neuron* **31**, 791–807.
- 732 **Zuchero, J. B. and Barres, B. A.** (2013). Intrinsic and extrinsic control of oligodendrocyte development.  
733 *Curr. Opin. Neurobiol.* **23**, 914–920.
- 734
- 735

736 **Figure Legends**

737

738 **Fig. 1. pMN progenitors express *prdm8*.** (A) Representative transverse sections of trunk spinal cord, with  
739 dorsal up, showing *prdm8* RNA (blue) and *olig2:EGFP* (green) expression. Developmental stages noted  
740 at the top. (B) UMAP visualization of the scRNA-seq dataset from *olig2:EGFP*<sup>+</sup> spinal cord cells obtained  
741 from 24, 36 and 48 hpf *Tg(olig2:EGFP)* embryos. Each point represents one cell (n=6489). Colors  
742 represent sample time points. (C-F) UMAP plots of selected transcripts. Cells are colored by expression  
743 level (gray is low, purple is high). *prdm8* expression overlaps extensively with *olig2*, *sox19a* and *nkx2.2a*.  
744 (G-J) Representative transverse trunk spinal cord sections processed for fluorescent ISH to detect *olig2*,  
745 *prdm8* and *nkx2.2a* mRNA. (G) 24 hpf (H) 36 hpf (I) 48 hpf (J) 72 hpf; arrowheads indicate  
746 *prdm8*<sup>+</sup>/*nkx2.2a*<sup>+</sup>/*olig2*<sup>+</sup> cells; solid arrows denote *prdm8*<sup>+</sup>/*nkx2.2a*<sup>-</sup>/*olig2*<sup>+</sup> cells; dashed arrows label  
747 *prdm8*<sup>-</sup>/*nkx2.2a*<sup>+</sup>/*olig2*<sup>+</sup> cells; dashed ovals outline the spinal cord. Scale bars: 10 μm.

748

749 **Fig. 2. Differentiating oligodendrocytes downregulate *prdm8* expression.** (A-D) UMAP plots of select  
750 transcripts. Cells are colored by expression level (gray is low, purple is high). *prdm8* expression overlaps  
751 considerably with *sox10* and *myrf* but not with *mbpa*. (E) UMAP visualization of subclustered 48 hpf pre-  
752 myelinating oligodendrocytes (n=220), indicated by the box. (F) Heatmap showing select transcripts  
753 expressed by pre-myelinating oligodendrocytes. (G) Representative transverse trunk spinal cord sections  
754 obtained from 72 hpf larvae processed for fluorescent ISH. Dorsal is up. Arrowheads mark  
755 *prdm8*<sup>+</sup>/*myrf*<sup>+</sup>/*olig2*<sup>+</sup> pre-myelinating oligodendrocytes that express *prdm8*; dashed arrows point to  
756 *prdm8*<sup>-</sup>/*myrf*<sup>+</sup>/*olig2*<sup>+</sup> pre-myelinating oligodendrocytes that do not express *prdm8*; solid arrows denote  
757 *prdm8*<sup>+</sup>/*myrf*<sup>-</sup>/*olig2*<sup>+</sup> OPCs. (H) *prdm8* expression (FPKM) in OPCs (n=3) and oligodendrocytes (n=3)  
758 isolated from batched 7 dpf larvae. Data represent mean ± s.e.m. Statistical significance assessed by one-  
759 way ANOVA. (I,J) Representative transverse trunk spinal cord sections obtained from 7 dpf larvae

760 processed for fluorescent ISH, dorsal on top. (I) Arrowhead denotes a *prdm8*<sup>-</sup>/*myrf*<sup>+</sup>/*olig2*<sup>+</sup> myelinating  
761 oligodendrocyte; solid arrow denotes a *prdm8*<sup>+</sup>/*myrf*<sup>-</sup>/*olig2*<sup>+</sup> OPC. (J) Arrowhead labels a  
762 *prdm8*<sup>+</sup>/*cspg4*<sup>+</sup>/*olig2*<sup>+</sup> OPC; dashed oval outlines the spinal cord boundary. Scale bar: 10 μm.

763

764 **Fig. 3. Generation and characterization of *prdm8* loss-of-function mutations.** (A) Zebrafish Prdm8  
765 protein structure is depicted as an empty black box with the SET domain highlighted in green and the  
766 C2H2 zinc finger domains in blue. Alignment of Prdm8 amino acid sequences from human (HS), mouse  
767 (MM), and zebrafish (DR). Conserved SET domain and C2H2 zinc finger domains are shown as green or  
768 blue boxes, respectively. (B) Schematic representing *prdm8* gene structure. The sequence targeted for  
769 CRISPR/Cas9-mediated mutagenesis is marked by a red line in exon 1. The wild-type sequence CRISPR  
770 target sequence is shown below as red text and the *co49* insertion and *co51* deletion are shown as  
771 bolded text or dashes, respectively. Both mutations are predicted to produce 73 amino acid proteins  
772 truncated at the C-terminal end of the SET domain. (C) Images showing *prdm8* DNA fragmentation  
773 following dCAPS genotyping of homozygous wild-type, heterozygous and homozygous mutant embryos  
774 with sample genotype frequencies. (D) Representative images of living 24 hpf wild-type and *prdm8*<sup>co49/-</sup>  
775 embryos

776

777 **Fig. 4. *prdm8* mutant larvae have excess oligodendrocytes.** (A,C,E,G) Representative trunk spinal cord  
778 transverse sections obtained from 72 hpf larvae showing mRNA expression patterns detected by ISH.  
779 Images and quantification of *myrf* expression in wild-type, heterozygous and homozygous *co49* mutant  
780 larvae (A,B), wild-type and homozygous *co51* mutant larvae (C,D) and wild-type and *co49/co51* mutant  
781 larvae (E,F). Arrowheads mark *myrf*<sup>+</sup> oligodendrocytes. (G,H) Images of *mbpa* expression and  
782 quantification of dorsal *mbpa*<sup>+</sup> oligodendrocytes in wild-type and homozygous *co49* mutant larvae.

783 Arrowheads denote *mbpa*<sup>+</sup> oligodendrocytes. n = 10 larvae for each genotype except wild type in B (n =  
784 9), and *co49/co51* mutant larvae in F (n = 8). Data represent mean ± s.e.m. Statistical significance  
785 evaluated by Mann-Whitney U test (B, D, F) and Student's t test (H). Scale bars: 10 μm.

786

787 **Figure 5. *prdm8* mutant larvae have more myelinating oligodendrocytes and a deficit of OPCs.** (A,C,E)

788 Representative images of trunk spinal cord transverse sections processed to detect Sox10 expression

789 (blue) in combination with transgenic reporter gene expression (pink). (A,B) The number of Sox10<sup>+</sup>

790 *olig2*:EGFP<sup>+</sup> oligodendrocyte lineage cells is similar in 72 hpf wild-type and *prdm8*<sup>co49</sup> mutant larvae.

791 Arrowheads indicate oligodendrocyte lineage cells. n = 10 for both genotypes. (C,D) 5 dpf *prdm8*<sup>co49</sup>

792 mutant larvae have more Sox10<sup>+</sup> *mbpa*:tagRFP<sup>+</sup> oligodendrocytes (arrowheads) than wild-type larvae

793 but there was no difference in total Sox10<sup>+</sup> oligodendrocyte lineage cells (*prdm8*<sup>co49</sup>:  $\bar{x}$ =10.4±0.61, wild-

794 type:  $\bar{x}$ =11.4±0.34, *p*=0.19, graph not depicted). n = 14 for both genotypes. (E,F) 5 dpf *prdm8*<sup>co49</sup> mutant

795 larvae ( $\bar{x}$ =2.5±0.16) have fewer Sox10<sup>+</sup> *cspg4*:mCherry<sup>+</sup> OPCs (arrowheads) than wild-type larvae

796 ( $\bar{x}$ =4.7±0.29), but the number of total Sox10<sup>+</sup> oligodendrocyte lineage cells was unchanged (*prdm8*<sup>co49</sup>:

797  $\bar{x}$ =7.6±1.6, wild-type:  $\bar{x}$ =8.1±0.11, *p*=0.70, graph not depicted). n = 14 for both genotypes. Data represent

798 mean ± s.e.m. Statistical significance evaluated by Student's t test (B, D) and Mann-Whitney U test (F).

799 Scale bars: 10 μm.

800

801 **Figure 6. *prdm8* mutant embryos have a deficit of motor neurons.** (A,C,E) Representative images of

802 trunk spinal cord transverse sections processed to detect Isl expression (pink) in combination with

803 *olig2*:EGFP (blue). (A,B) The number of Isl<sup>+</sup> *olig2*:EGFP<sup>+</sup> motor neurons is similar in 24 hpf wild-type (n=8)

804 and *prdm8*<sup>co49</sup> mutant embryos (n=9). (C,D) 36 hpf *prdm8*<sup>co49</sup> mutant embryos (n=10) have fewer Isl<sup>+</sup>

805 *olig2*:EGFP<sup>+</sup> motor neurons than wild-type embryos (n=8). (E,F) 48 hpf *prdm8*<sup>co49</sup> mutant embryos (n=9,

806  $\bar{x}=16.4\pm 0.46$ ) have fewer *Isl*<sup>+</sup> *olig2*:EGFP<sup>+</sup> motor neurons than wild-type embryos (n=8,  $\bar{x}=21.8\pm 0.86$ ).  
807 Data represent mean  $\pm$  s.e.m. Statistical significance evaluated by Student's *t* test (B,F) and Mann-  
808 Whitney U test (D). Scale bars: 10  $\mu$ m.

809

810 **Figure 7. *prdm8* mutant embryos prematurely switch from motor neuron to OPC production.** (A)

811 Schematic of BrdU pulses. (B-G) Representative images of trunk spinal cord sections from 48 hpf embryos

812 treated with BrdU and processed to detect *Isl* (pink), *Sox10* (yellow) and BrdU (blue). Wild-type (B) and

813 *prdm8*<sup>co49/-</sup> (E) embryos pulsed with BrdU at 24 hpf. Wild-type (C) and *prdm8*<sup>co49/-</sup> (F) embryos pulsed

814 with BrdU at 30 hpf. Wild-type (D) and *prdm8*<sup>co49/-</sup> (G) embryos pulsed with BrdU at 36 hpf. (H)

815 Quantification of *Isl*<sup>+</sup>/BrdU<sup>+</sup> motor neurons pulsed with BrdU at 24 hpf in wild-type (n=15) and *prdm8*<sup>co49/-</sup>

816 <sup>-</sup> (n=7); 30 hpf in wild-type (n=7) and *prdm8*<sup>co49/-</sup> (n=7,); 36 hpf in wild-type (n=7) and *prdm8*<sup>co49/-</sup> (n=6).

817 (I) Quantification of *Sox10*<sup>+</sup>/BrdU<sup>+</sup> cells pulsed with BrdU at 24 hpf in wild-type (n=15) and *prdm8*<sup>co49/-</sup>

818 (n=7); 30 hpf in wild-type (n=7) and *prdm8*<sup>co49/-</sup> (n=8); 36 hpf in wild-type (n=6) and *prdm8*<sup>co49/-</sup> (n=5).

819 Data represent mean  $\pm$  s.e.m. Statistical significance evaluated by Manny-Whitney U test. Analysis of

820 embryos pulsed with BrdU at 24 hpf represent data collected from two laboratory replicates. Scale bars:

821 10  $\mu$ m.

822

823 **Figure 8. pMN cells prematurely express *nkx2.2a* in *prdm8* mutant embryos.** (A) Representative

824 transverse trunk spinal cord sections obtained from 28 hpf embryos processed for fluorescent ISH to

825 detect *olig2* (blue) and *nkx2.2a* (pink) mRNA. (B) More *nkx2.2a* puncta are located within the *olig2*<sup>+</sup> pMN

826 domain of *prdm8*<sup>co49/-</sup> embryos (n=9) compared to wild-type embryos (n=7). (C) Representative

827 transverse sections of trunk spinal cord obtained from 48 hpf embryos showing *nkx2.2a* RNA (blue) and

828 *olig2*:EGFP (green) expression. Arrowheads indicate dorsally migrated OLCs. (D) *prdm8*<sup>co49/-</sup> (n=10) have

829 more dorsal OPCs (*nkx2.2a<sup>+</sup>/olig2:EGFP<sup>+</sup>*) than wild-type embryos (n=10) at 48 hpf. Data represent mean  
830  $\pm$  s.e.m. Statistical significance evaluated by Student's *t* test. Scale bars: 10  $\mu$ m.

831

832 **Figure 9. Spinal cord cells of *prdm8* mutant embryos have elevated Shh signaling activity.** (A)

833 Representative transverse sections of trunk spinal cords obtained from 24 and 48 hpf wild-type and

834 *prdm8<sup>co49/-</sup>* embryos, with dorsal up, showing *ptch2* RNA expression. (B-C) Representative transverse

835 trunk spinal cord sections processed for fluorescent ISH to detect *olig2* (blue) and *ptch2* (pink) mRNA at

836 24 hpf (B) and 36 hpf (C). (D) *prdm8<sup>co49/-</sup>* embryos have more *ptch2* puncta per AU<sup>2</sup> of spinal cord at 24

837 hpf (n=6) and 36 hpf (n=10) than wild-type embryos at 24 hpf (n=9) and 36 hpf (n=6). (E) Representative

838 transverse sections of trunk spinal cord, with dorsal up, showing *shha* RNA expression in 24 hpf wild-

839 type and *prdm8<sup>co49/-</sup>* embryos. Data represent mean  $\pm$  s.e.m. Statistical significance evaluated by

840 Student's *t* test. Dashed oval outlines the spinal cord boundary. Scale bars: 10  $\mu$ m.

841

842 **Figure 10. Shh inhibition rescues the motor neuron but not oligodendrocyte phenotypes of *prdm8***

843 **mutant embryos.** (A,C,E,G) Representative images of trunk spinal cord sections from 48 hpf embryos

844 treated with 0.5  $\mu$ M cyclopamine (CYCLO) or ethanol (EtOH) from 18-30 hpf (A,E) or 30-42 hpf (C, G) and

845 processed to detect Isl (A,C) or Sox10 (E,G) expression. (A,B) Wild-type embryos treated with EtOH

846 control solution and *prdm8* mutant embryos treated with cyclopamine have similar numbers of motor

847 neurons. (C,D) There are fewer motor neurons (Isl<sup>+</sup>) in *prdm8<sup>co49/-</sup>* embryos treated with EtOH and

848 cyclopamine compared to wild-type embryos treated with EtOH. (E,F) There are fewer OPCs

849 (Sox10<sup>+</sup>; arrowheads) in *prdm8<sup>co49/-</sup>* embryos treated with cyclopamine and no difference in OPCs

850 *prdm8<sup>co49/-</sup>* embryos treated with EtOH compared to wild-type embryos treated with EtOH. (G,H) There

851 are fewer OPCs (Sox10<sup>+</sup>; arrowheads) in *prdm8<sup>co49/-</sup>* embryos treated with cyclopamine and slightly less

852 OPCs in *prdm8<sup>co49/-</sup>* embryos treated with EtOH compared to wild-type embryos treated with EtOH. (I)

853 Representative trunk spinal cord transverse sections obtained from 72 hpf larvae treated with 0.5  $\mu$ M

854 cyclopamine or ethanol (EtOH) from 30-42 hpf showing *myrf* mRNA expression detected by in situ RNA

855 hybridization. (I,J) *prdm8<sup>co49/-</sup>* embryos treated with EtOH or cyclopamine have more oligodendrocytes

856 (*myrf<sup>+</sup>*; arrowheads) than wild-type embryos treated with EtOH. n= 10 for all genotypes and treatments

857 expect n=11 for wild-type embryos treated with EtOH (A,E). Data represent mean  $\pm$  s.e.m. Statistical

858 significance evaluated by Student's *t* test. \* $p$ <0.05, \*\* $p$ <0.001, \*\*\* $p$ <0.0001. Scale bars: 10  $\mu$ m.

859

860

861



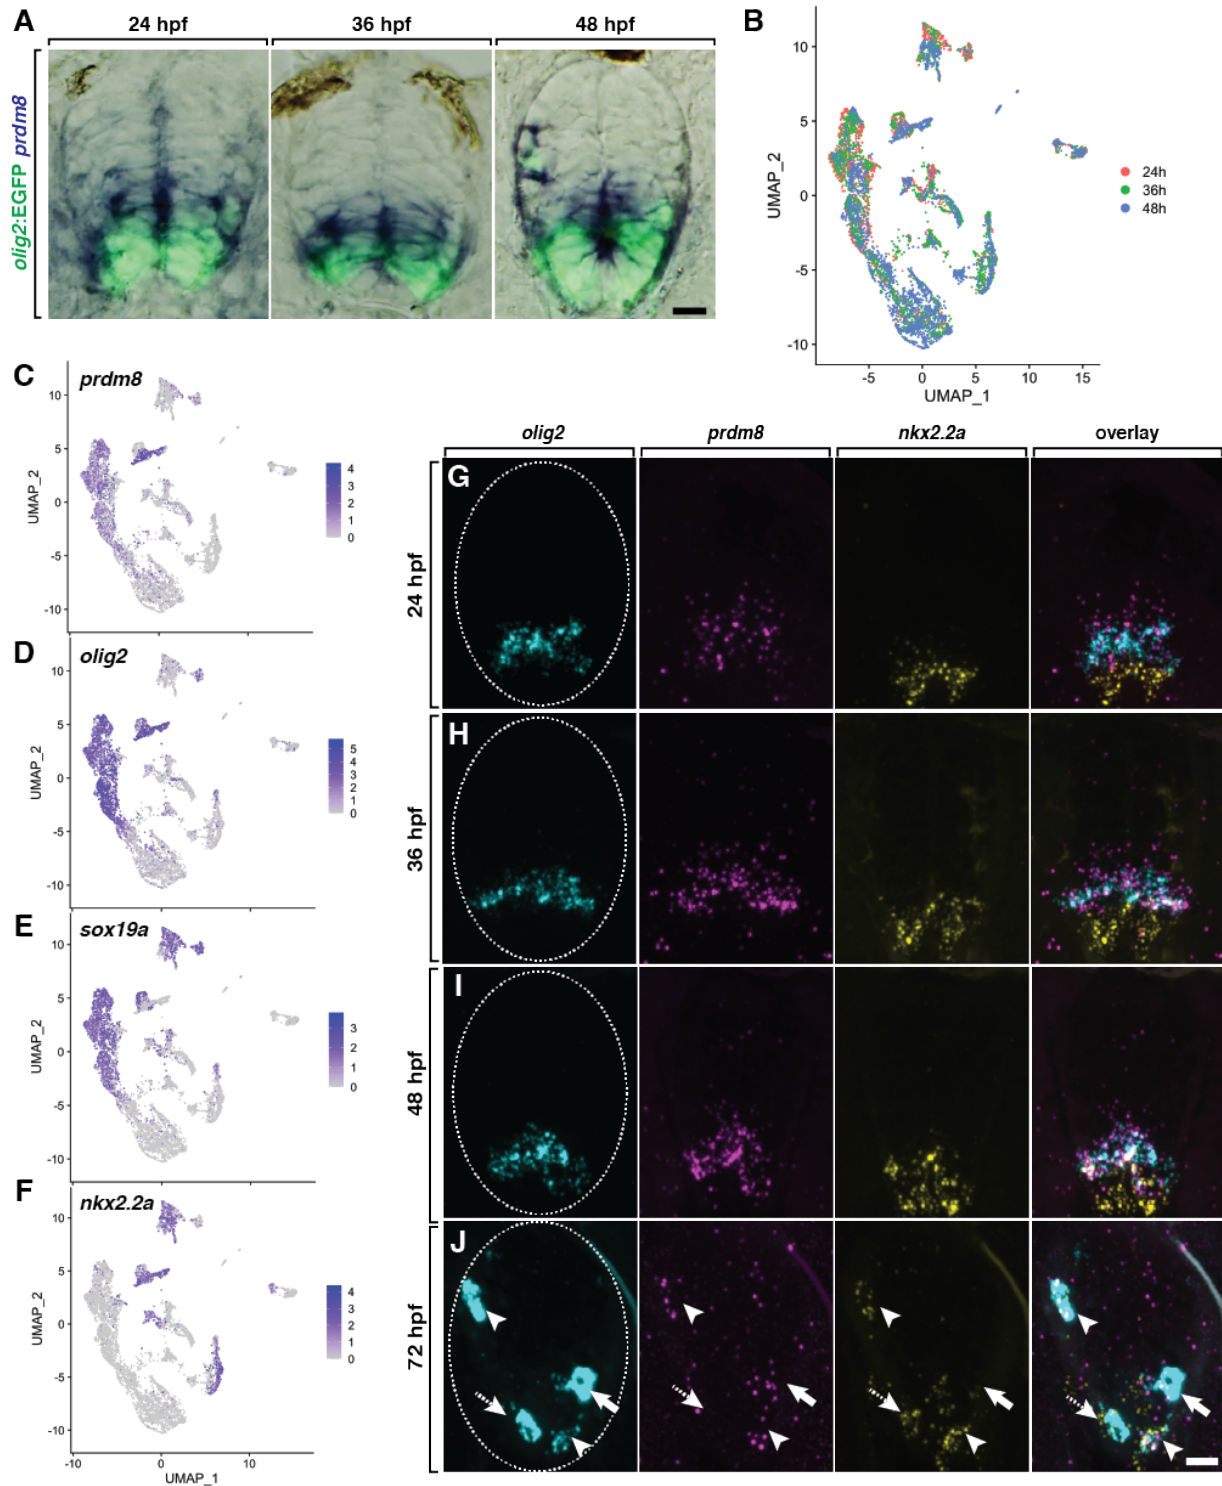

**Fig. 1. pMN progenitors express *prdm8*.** (A) Representative transverse sections of trunk spinal cord, with dorsal up, showing *prdm8* RNA (blue) and *olig2:EGFP* (green) expression. Developmental stages noted at the top. (B) UMAP visualization of the scRNA-seq dataset from *olig2:EGFP*<sup>+</sup> spinal cord cells obtained from 24, 36 and 48 hpf *Tg(olig2:EGFP)* embryos. Each point represents one cell (n=6489). Colors represent sample time points. (C-F) UMAP plots of selected transcripts. Cells are colored by expression level (gray is low, purple is high). *prdm8* expression overlaps extensively with *olig2*, *sox19a* and *nkx2.2a*. (G-J) Representative transverse trunk spinal cord sections processed for fluorescent ISH to detect *olig2*, *prdm8* and *nkx2.2a* mRNA. (G) 24 hpf (H) 36 hpf (I) 48 hpf (J) 72 hpf; arrowheads indicate *prdm8*<sup>+</sup>/*nkx2.2a*<sup>+</sup>/*olig2*<sup>+</sup> cells; solid arrows denote *prdm8*<sup>+</sup>/*nkx2.2a*<sup>-</sup>/*olig2*<sup>+</sup> cells; dashed arrows label *prdm8*<sup>-</sup>/*nkx2.2a*<sup>+</sup>/*olig2*<sup>+</sup> cells; dashed ovals outline the spinal cord. Scale bars: 10 µm.

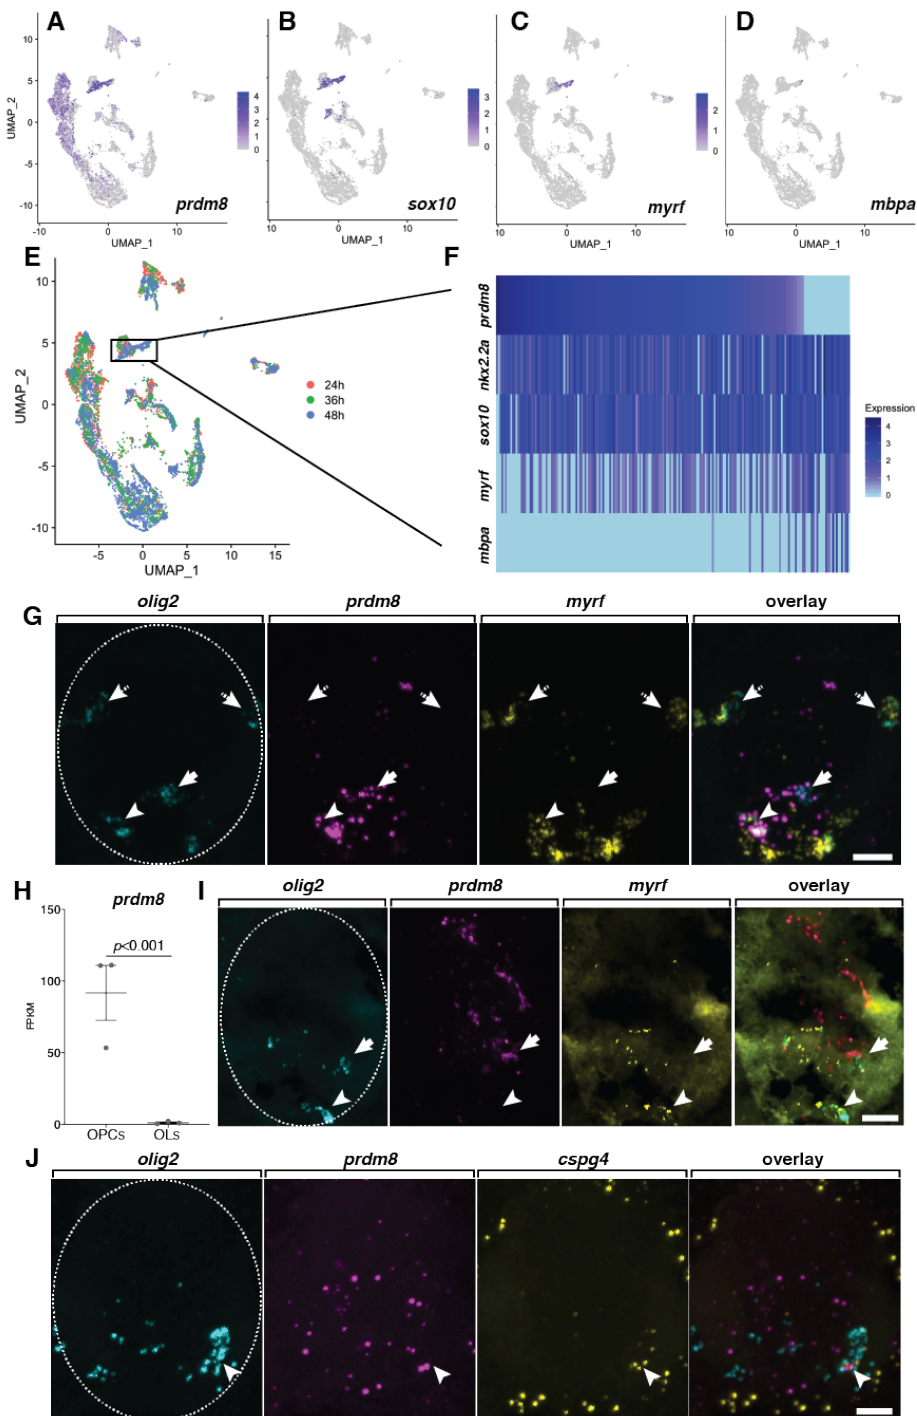

**Fig. 2. Differentiating oligodendrocytes downregulate *prdm8* expression.** (A-D) UMAP plots of select transcripts. Cells are colored by expression level (gray is low, purple is high). *prdm8* expression overlaps considerably with *sox10* and *myrf* but not with *mbpa*. (E) UMAP visualization of subclustered 48 hpf pre-myelinating oligodendrocytes (n=220), indicated by the box. (F) Heatmap showing select transcripts expressed by pre-myelinating oligodendrocytes. (G) Representative transverse trunk spinal cord sections obtained from 72 hpf larvae processed for fluorescent ISH. Dorsal is up. Arrowheads mark *prdm8*<sup>+</sup>/*myrf*<sup>+</sup>/*olig2*<sup>+</sup> pre-myelinating oligodendrocytes that express *prdm8*; dashed arrows point to *prdm8*<sup>-</sup>/*myrf*<sup>+</sup>/*olig2*<sup>+</sup> pre-myelinating oligodendrocytes that do not express *prdm8*; solid arrows denote *prdm8*<sup>+</sup>/*myrf*<sup>+</sup>/*olig2*<sup>+</sup> OPCs. (H) *prdm8* expression (FPKM) in OPCs (n=3) and oligodendrocytes (n=3) isolated from batched 7 dpf larvae. Data represent mean  $\pm$  s.e.m. Statistical significance assessed by one-way ANOVA. (I,J) Representative transverse trunk spinal cord sections obtained from 7 dpf larvae processed for fluorescent ISH, dorsal on top. (I) Arrowhead denotes a *prdm8*<sup>+</sup>/*myrf*<sup>+</sup>/*olig2*<sup>+</sup> myelinating oligodendrocyte; solid arrow denotes a *prdm8*<sup>+</sup>/*myrf*<sup>+</sup>/*olig2*<sup>+</sup> OPC. (J) Arrowhead labels a *prdm8*<sup>+</sup>/*cspg4*<sup>+</sup>/*olig2*<sup>+</sup> OPC; dashed oval outlines the spinal cord boundary. Scale bar: 10  $\mu$ m.

863

864

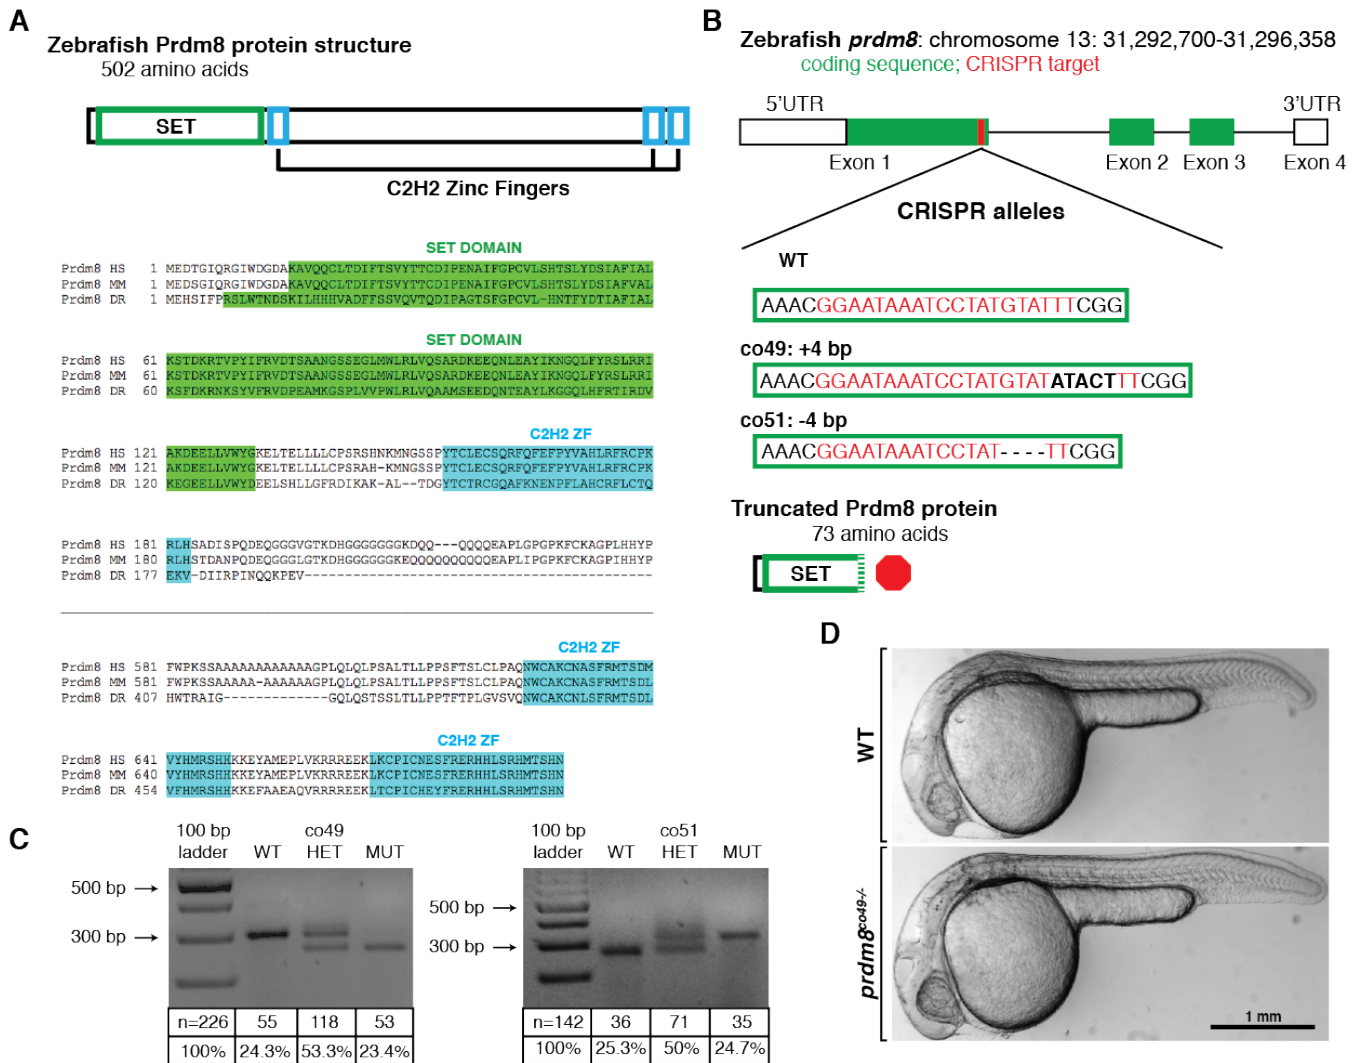

**Fig. 3. Generation and characterization of *prdm8* loss-of-function mutations.** (A) Zebrafish Prdm8 protein structure is depicted as an empty black box with the SET domain highlighted in green and the C2H2 zinc finger domains in blue. Alignment of Prdm8 amino acid sequences from human (HS), mouse (MM), and zebrafish (DR). Conserved SET domain and C2H2 zinc finger domains are shown as green or blue boxes, respectively. (B) Schematic representing *prdm8* gene structure. The sequence targeted for CRISPR/Cas9-mediated mutagenesis is marked by a red line in exon 1. The wild-type sequence CRISPR target sequence is shown below as red text and the co49 insertion and co51 deletion are shown as bolded text or dashes, respectively. Both mutations are predicted to produce 73 amino acid proteins truncated at the C-terminal end of the SET domain. (C) Images showing *prdm8* DNA fragmentation following dCAPS genotyping of homozygous wild-type, heterozygous and homozygous mutant embryos with sample genotype frequencies. (D) Representative images of living 24 hpf wild-type and *prdm8*<sup>co49-/-</sup> embryos

865

866

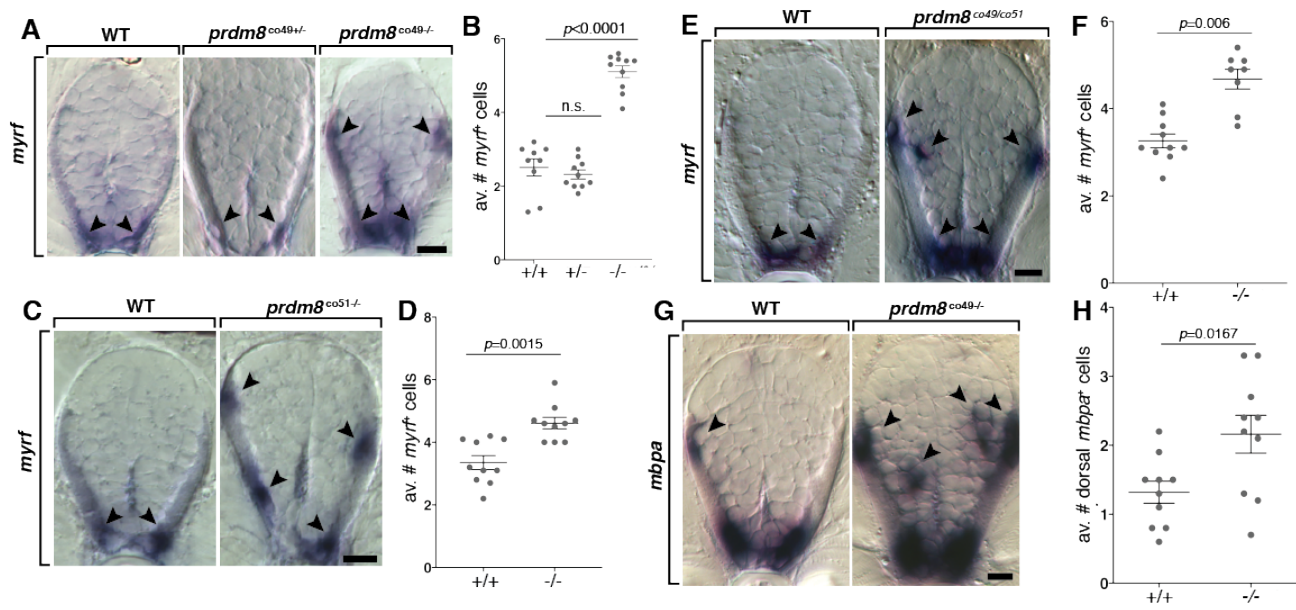

**Fig. 4. *prdm8* mutant larvae have excess oligodendrocytes.** (A,C,E,G) Representative trunk spinal cord transverse sections obtained from 72 hpf larvae showing mRNA expression patterns detected by ISH. Images and quantification of *myrf* expression in wild-type, heterozygous and homozygous *co49* mutant larvae (A,B), wild-type and homozygous *co51* mutant larvae (C,D) and wild-type and *co49/co51* mutant larvae (E,F). Arrowheads mark *myrf*<sup>+</sup> oligodendrocytes. (G,H) Images of *mbpa* expression and quantification of dorsal *mbpa*<sup>+</sup> oligodendrocytes in wild-type and homozygous *co49* mutant larvae. Arrowheads denote *mbpa*<sup>+</sup> oligodendrocytes. n = 10 larvae for each genotype except wild type in B (n = 9), and *co49/co51* mutant larvae in F (n = 8). Data represent mean ± s.e.m. Statistical significance evaluated by Mann-Whitney U test (B, D, F) and Student's t test (H). Scale bars: 10 μm.

867

868

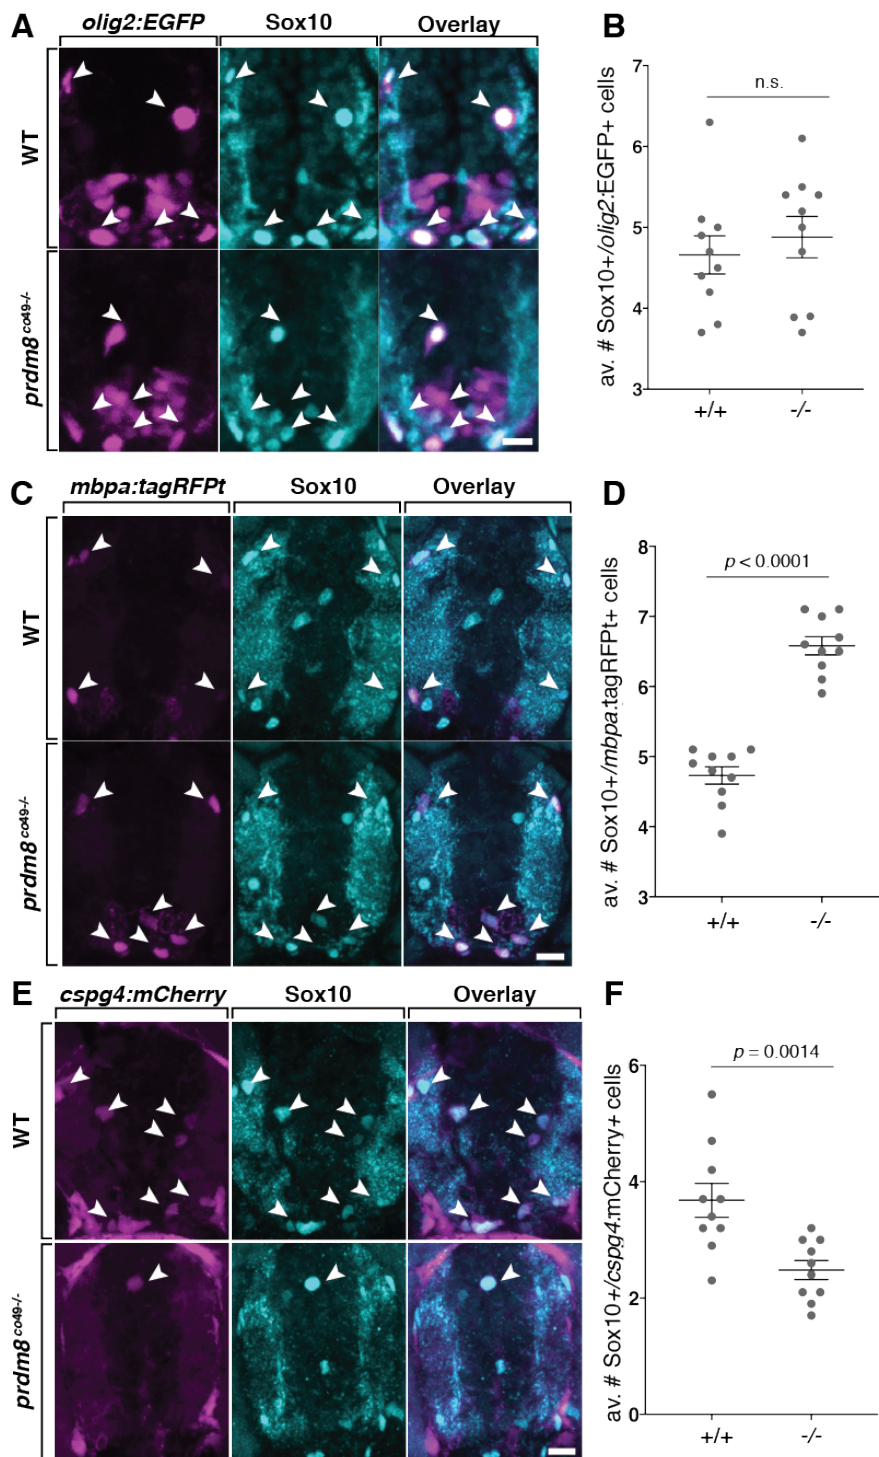

**Figure 5. *prdm8* mutant larvae have more myelinating oligodendrocytes and a deficit of OPCs.** (A,C,E) Representative images of trunk spinal cord transverse sections processed to detect Sox10 expression (blue) in combination with transgenic reporter gene expression (pink). (A,B) The number of Sox10+ *olig2:EGFP*+ oligodendrocyte lineage cells is similar in 72 hpf wild-type and *prdm8<sup>co49</sup>* mutant larvae. Arrowheads indicate oligodendrocyte lineage cells.  $n = 10$  for both genotypes. (C,D) 5 dpf *prdm8<sup>co49</sup>* mutant larvae have more Sox10+ *mbpa:tagRFP*+ oligodendrocytes (arrowheads) than wild-type larvae but there was no difference in total Sox10+ oligodendrocyte lineage cells (*prdm8<sup>co49</sup>*:  $x = 10.4 \pm 0.61$ , wild-type:  $x = 11.4 \pm 0.34$ ,  $p = 0.19$ , graph not depicted).  $n = 14$  for both genotypes. (E,F) 5 dpf *prdm8<sup>co49</sup>* mutant larvae ( $x = 2.5 \pm 0.16$ ) have fewer Sox10+ *cspg4:mCherry*+ OPCs (arrowheads) than wild-type larvae ( $x = 4.7 \pm 0.29$ ), but the number of total Sox10+ oligodendrocyte lineage cells was unchanged (*prdm8<sup>co49</sup>*:  $x = 7.6 \pm 1.6$ , wild-type:  $x = 8.1 \pm 0.11$ ,  $p = 0.70$ , graph not depicted).  $n = 14$  for both genotypes. Data represent mean  $\pm$  s.e.m. Statistical significance evaluated by Student's t test (B, D) and Mann-Whitney U test (F). Scale bars: 10  $\mu$ m.

869

870

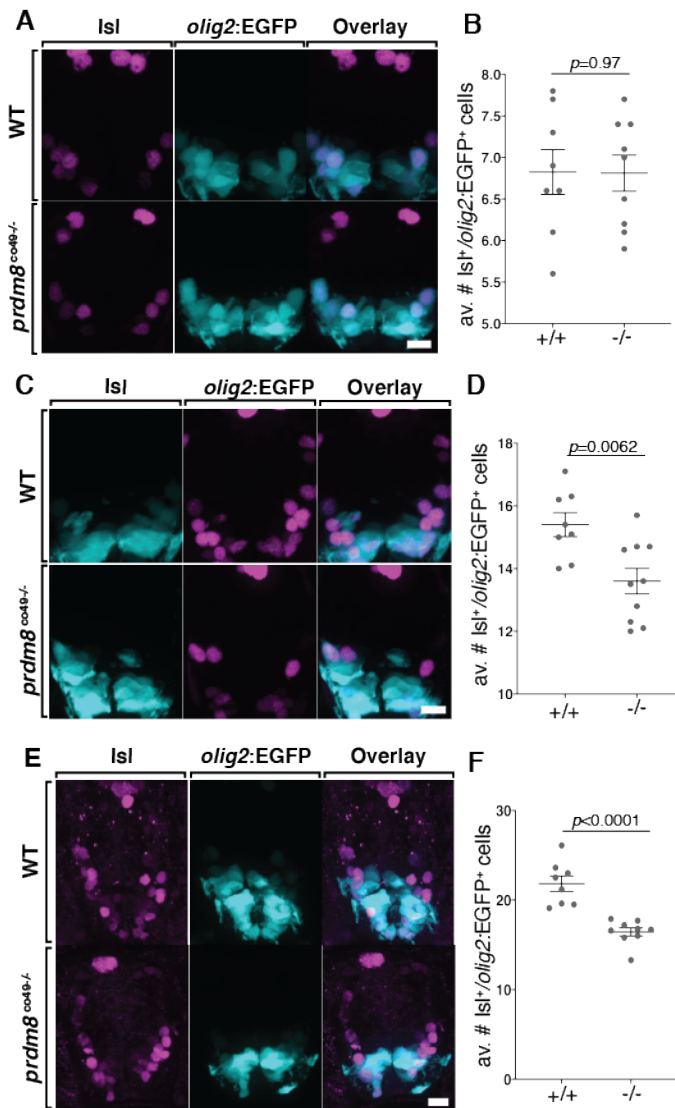

**Figure 6. *prdm8* mutant embryos have a deficit of motor neurons.** (A,C,E) Representative images of trunk spinal cord transverse sections processed to detect *Isl* expression (pink) in combination with *olig2:EGFP* (blue). (A,B) The number of *Isl<sup>+</sup> olig2:EGFP<sup>+</sup>* motor neurons is similar in 24 hpf wild-type (n=8) and *prdm8<sup>co49</sup>* mutant embryos (n=9). (C,D) 36 hpf *prdm8<sup>co49</sup>* mutant embryos (n=10) have fewer *Isl<sup>+</sup> olig2:EGFP<sup>+</sup>* motor neurons than wild-type embryos (n=8). (E,F) 48 hpf *prdm8<sup>co49</sup>* mutant embryos (n=9,  $\bar{x}=16.4\pm 0.46$ ) have fewer *Isl<sup>+</sup> olig2:EGFP<sup>+</sup>* motor neurons than wild-type embryos (n=8,  $\bar{x}=21.8\pm 0.86$ ). Data represent mean  $\pm$  s.e.m. Statistical significance evaluated by Student's t test (B,F) and Mann-Whitney U test (D). Scale bars: 10  $\mu$ m.

871

872

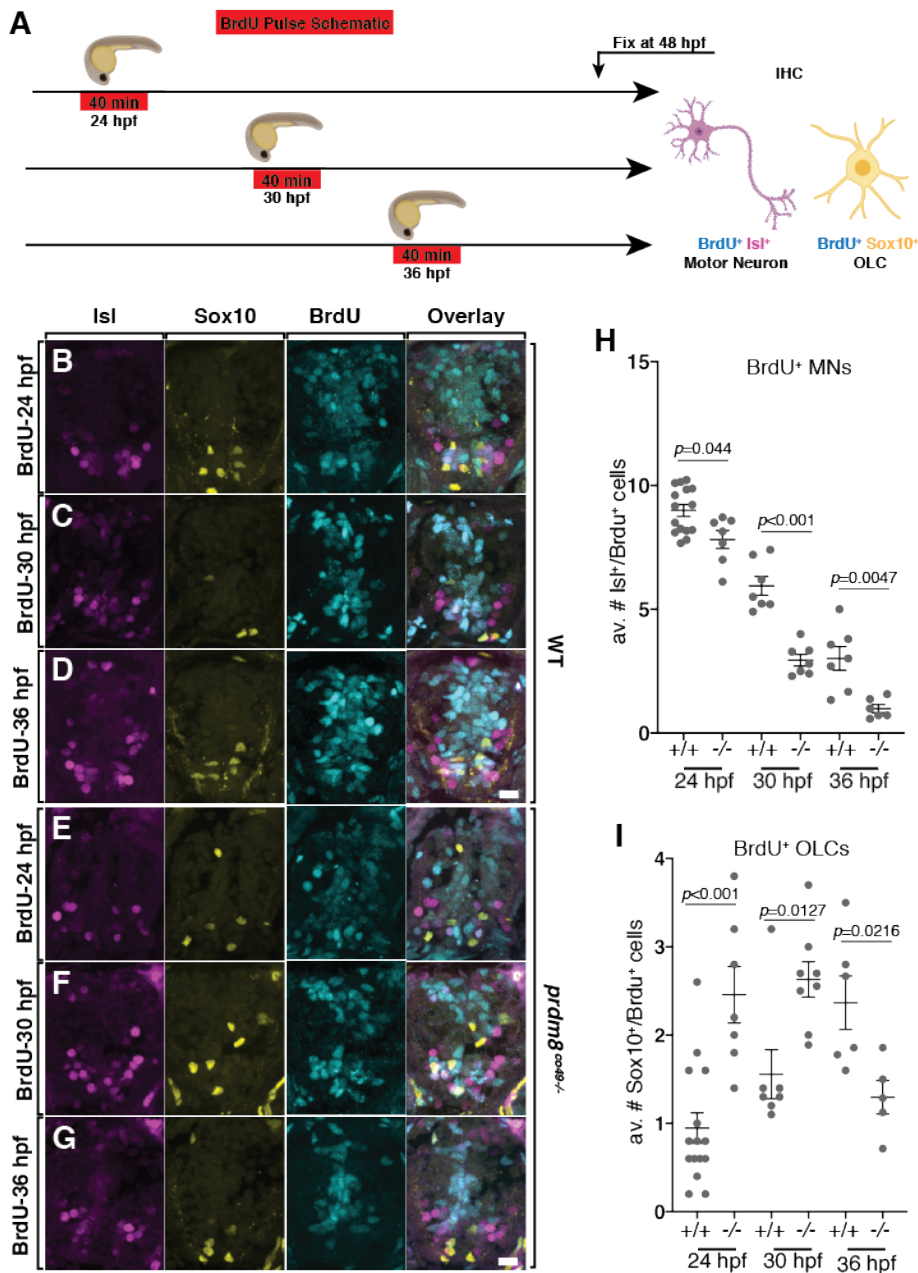

**Figure 7. *prdm8* mutant embryos prematurely switch from motor neuron to OPC production.** (A) Schematic of BrdU pulses. (B-G) Representative images of trunk spinal cord sections from 48 hpf embryos treated with BrdU and processed to detect Isl1 (pink), Sox10 (yellow) and BrdU (blue). Wild-type (B) and *prdm8*<sup>co49/-</sup> (E) embryos pulsed with BrdU at 24 hpf. Wild-type (C) and *prdm8*<sup>co49/-</sup> (F) embryos pulsed with BrdU at 30 hpf. Wild-type (D) and *prdm8*<sup>co49/-</sup> (G) embryos pulsed with BrdU at 36 hpf. (H) Quantification of Isl1<sup>+</sup>/BrdU<sup>+</sup> motor neurons pulsed with BrdU at 24 hpf in wild-type (n=15) and *prdm8*<sup>co49/-</sup> (n=7); 30 hpf in wild-type (n=7) and *prdm8*<sup>co49/-</sup> (n=7); 36 hpf in wild-type (n=7) and *prdm8*<sup>co49/-</sup> (n=6). (I) Quantification of Sox10<sup>+</sup>/BrdU<sup>+</sup> cells pulsed with BrdU at 24 hpf in wild-type (n=15) and *prdm8*<sup>co49/-</sup> (n=7); 30 hpf in wild-type (n=7) and *prdm8*<sup>co49/-</sup> (n=8); 36 hpf in wild-type (n=6) and *prdm8*<sup>co49/-</sup> (n=5). Data represent mean ± s.e.m. Statistical significance evaluated by Mann-Whitney U test. Analysis of embryos pulsed with BrdU at 24 hpf represent data collected from two laboratory replicates. Scale bars: 10 μm.

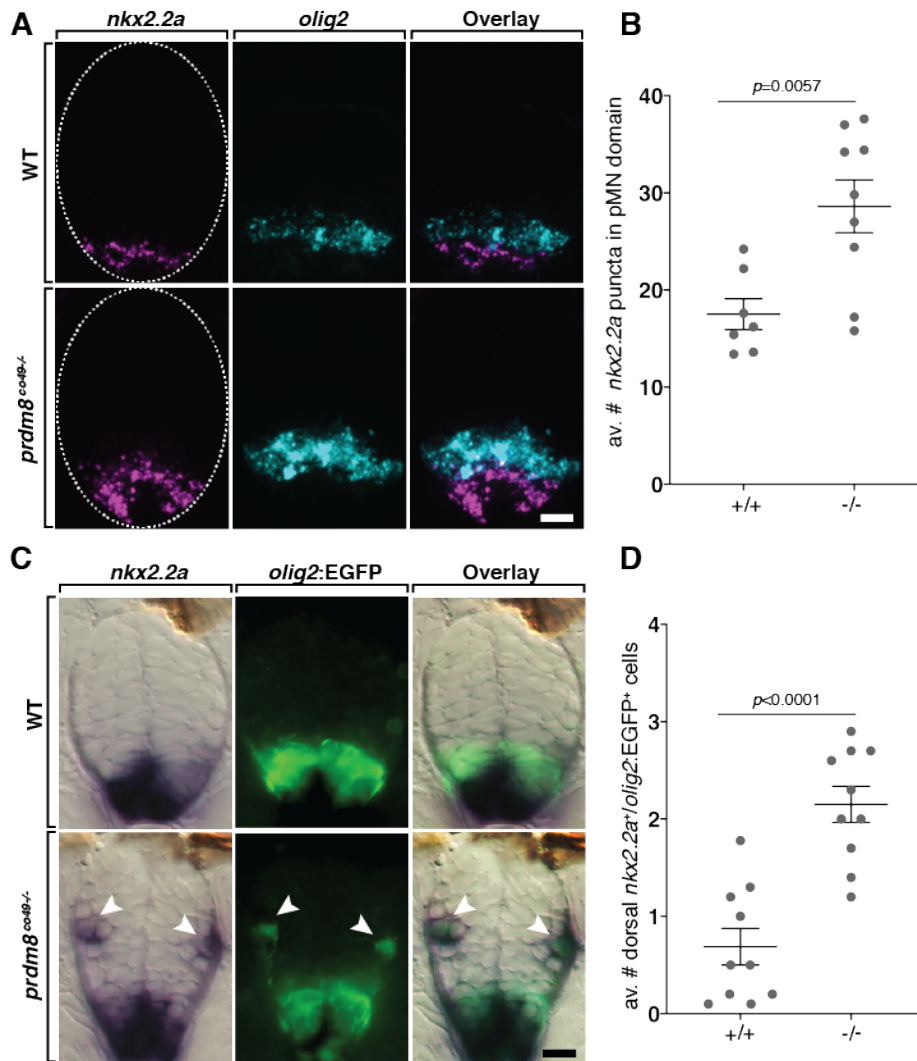

**Figure 8. pMN cells prematurely express *nkx2.2a* in *prdm8* mutant embryos.** (A) Representative transverse trunk spinal cord sections obtained from 28 hpf embryos processed for fluorescent ISH to detect *olig2* (blue) and *nkx2.2a* (pink) mRNA. (B) More *nkx2.2a* puncta are located within the *olig2*<sup>+</sup> pMN domain of *prdm8<sup>co49-/-</sup>* embryos (n=9) compared to wild-type embryos (n=7). (C) Representative transverse sections of trunk spinal cord obtained from 48 hpf embryos showing *nkx2.2a* RNA (blue) and *olig2:EGFP* (green) expression. Arrowheads indicate dorsally migrated OLCs. (D) *prdm8<sup>co49-/-</sup>* (n=10) have more dorsal OPCs (*nkx2.2a*<sup>+</sup>/*olig2:EGFP*<sup>+</sup>) than wild-type embryos (n=10) at 48 hpf. Data represent mean  $\pm$  s.e.m. Statistical significance evaluated by Student's t test. Scale bars: 10  $\mu$ m.

874

875



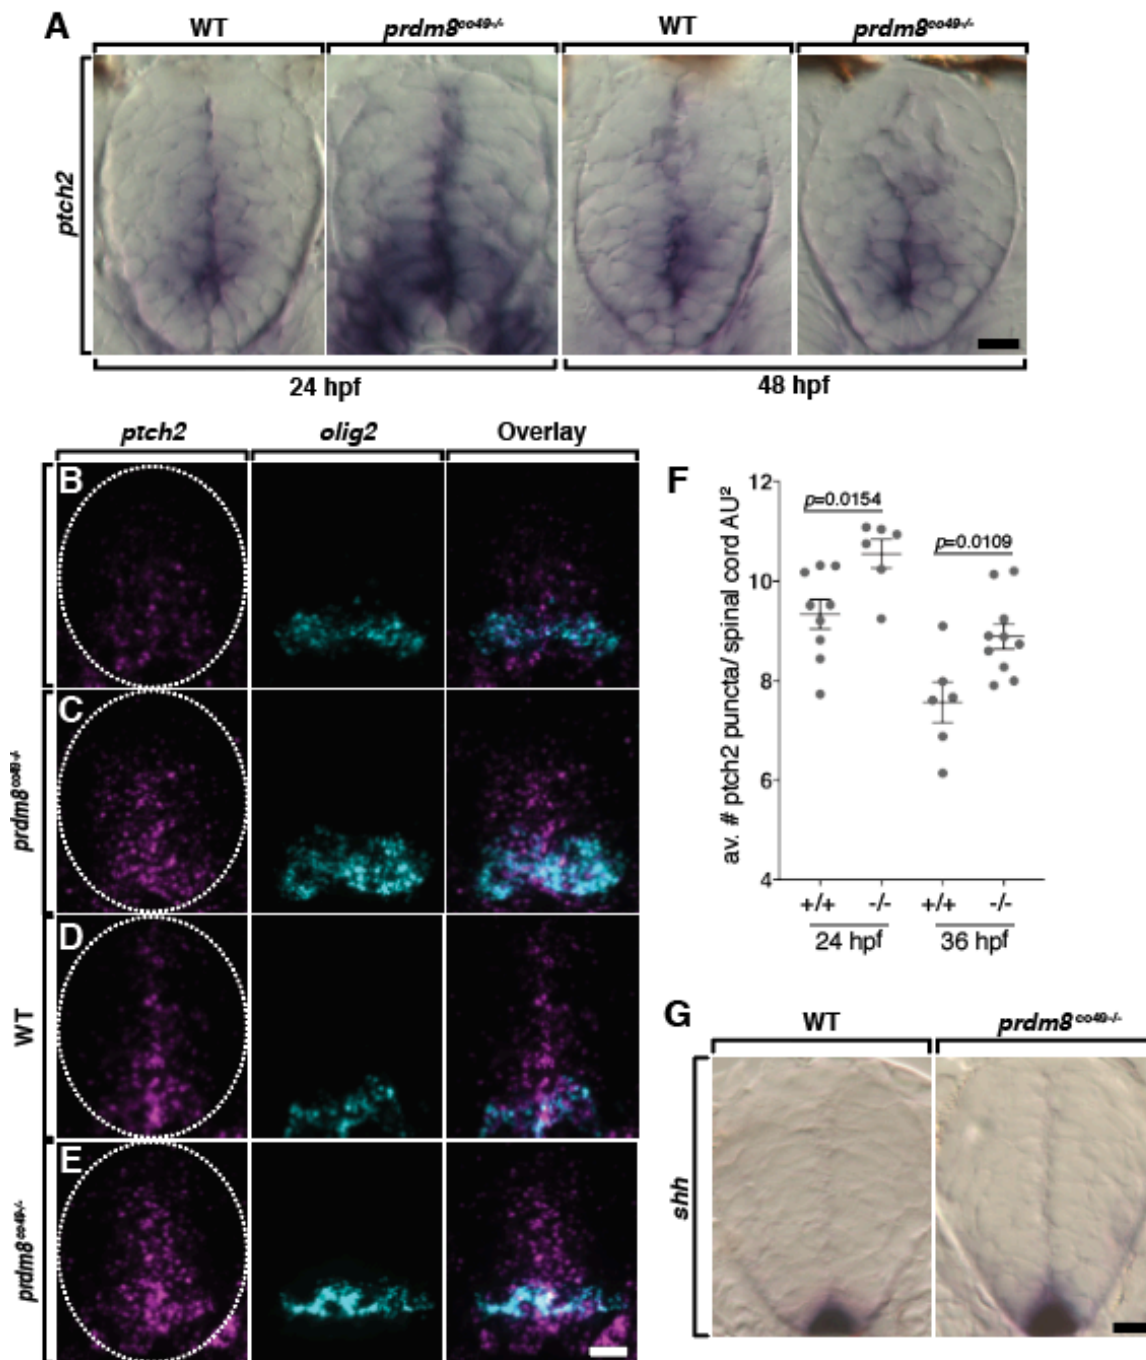

**Figure 9. Spinal cord cells of *prdm8* mutant embryos have elevated Shh signaling activity.** (A) Representative transverse sections of trunk spinal cords obtained from 24 and 48 hpf wild-type and *prdm8<sup>co49-/-</sup>* embryos, with dorsal up, showing *ptch2* RNA expression. (B-C) Representative transverse trunk spinal cord sections processed for fluorescent ISH to detect *olig2* (blue) and *ptch2* (pink) mRNA at 24 hpf (B) and 36 hpf (C). (D) *prdm8<sup>co49-/-</sup>* embryos have more *ptch2* puncta per AU<sup>2</sup> of spinal cord at 24 hpf (n=6) and 36 hpf (n=10) than wild-type embryos at 24 hpf (n=9) and 36 hpf (n=6). (E) Representative transverse sections of trunk spinal cord, with dorsal up, showing *shh* RNA expression in 24 hpf wild-type and *prdm8<sup>co49-/-</sup>* embryos. Data represent mean  $\pm$  s.e.m. Statistical significance evaluated by Student's t test. Dashed oval outlines the spinal cord boundary. Scale bars: 10  $\mu$ m.

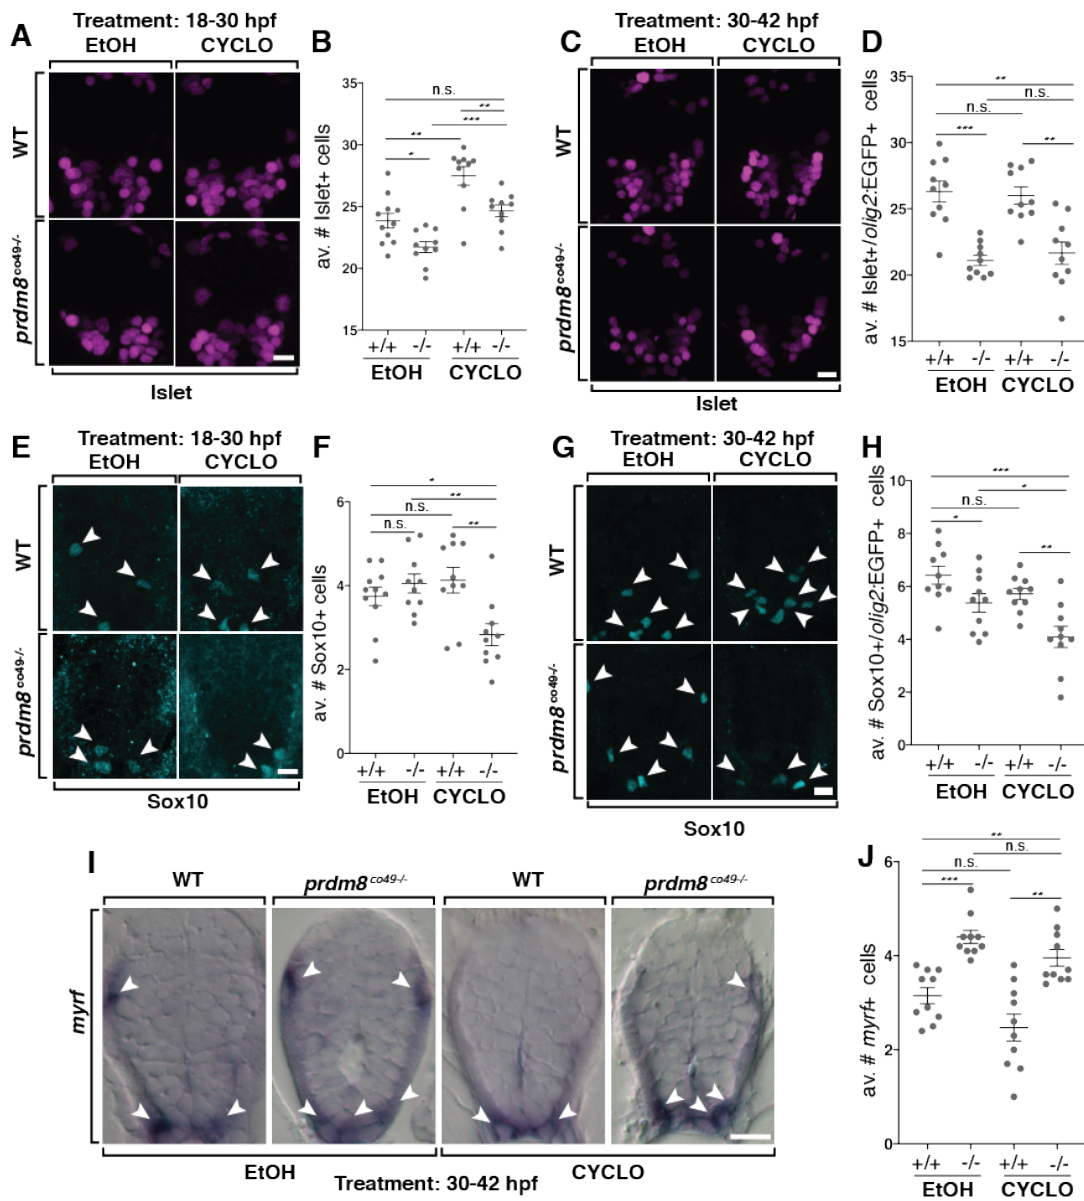

**Figure 10. Shh inhibition rescues the motor neuron but not oligodendrocyte phenotypes of *prdm8* mutant embryos.** (A,C,E,G) Representative images of trunk spinal cord sections from 48 hpf embryos treated with 0.5  $\mu$ M cyclopamine (CYCLO) or ethanol (EtOH) from 18-30 hpf (A,E) or 30-42 hpf (C, G) and processed to detect Isl (A,C) or Sox10 (E,G) expression. (A,B) Wild-type embryos treated with EtOH control solution and *prdm8* mutant embryos treated with cyclopamine have similar numbers of motor neurons. (C,D) There are fewer motor neurons (Islet<sup>+</sup>) in *prdm8*<sup>co49-/-</sup> embryos treated with EtOH and cyclopamine compared to wild-type embryos treated with EtOH. (E,F) There are fewer OPCs (Sox10<sup>+</sup>; arrowheads) in *prdm8*<sup>co49-/-</sup> embryos treated with cyclopamine and no difference in OPCs *prdm8*<sup>co49-/-</sup> embryos treated with EtOH compared to wild-type embryos treated with EtOH. (G,H) There are fewer OPCs (Sox10<sup>+</sup>; arrowheads) in *prdm8*<sup>co49-/-</sup> embryos treated with cyclopamine and slightly less OPCs in *prdm8*<sup>co49-/-</sup> embryos treated with EtOH compared to wild-type embryos treated with EtOH. (I) Representative trunk spinal cord transverse sections obtained from 72 hpf larvae treated with 0.5  $\mu$ M cyclopamine or ethanol (EtOH) from 30-42 hpf showing *myrf* mRNA expression detected by in situ RNA hybridization. (I,J) *prdm8*<sup>co49-/-</sup> embryos treated with EtOH or cyclopamine have more oligodendrocytes (*myrf*<sup>+</sup>; arrowheads) than wild-type embryos treated with EtOH. n = 10 for all genotypes and treatments expect n=11 for wild-type embryos treated with EtOH (A,E). Data represent mean  $\pm$  s.e.m. Statistical significance evaluated by Student's t test. \*p<0.05, \*\*p<0.001, \*\*\*p<0.0001. Scale bars: 10  $\mu$ m.
